# Supplementary material for: What is the association between adverse childhood experiences and late-life cognitive decline? Study of Healthy Aging in African Americans (STAR) cohort study
Source: PubMed Central journal article supplement — BMJ Open. 2023 Nov 2;13(11):e072961. doi: 10.1136/bmjopen-2023-072961 (PMC10626853; doi:10.1136/bmjopen-2023-072961), 2023-11-02
Supplement: bmjopen-2023-072961.draft_revisions.pdf [file bmjopen-2023-072961.draft_revisions.pdf]

# BMJ Open

BMJ Open is committed to open peer review. As part of this commitment we make the peer review history of every article we publish publicly available.

When an article is published we post the peer reviewers' comments and the authors' responses online. We also post the versions of the paper that were used during peer review. These are the versions that the peer review comments apply to.

The versions of the paper that follow are the versions that were submitted during the peer review process. They are not the versions of record or the final published versions. They should not be cited or distributed as the published version of this manuscript.

BMJ Open is an open access journal and the full, final, typeset and author-corrected version of record of the manuscript is available on our site with no access controls, subscription charges or pay-per-view fees (<http://bmjopen.bmj.com>).

If you have any questions on BMJ Open's open peer review process please email [info.bmjopen@bmj.com](mailto:info.bmjopen@bmj.com)

# BMJ Open

## What is the association between adverse childhood experiences and late-life cognitive decline? Study of Healthy Aging in African Americans (STAR) Cohort Study

|                               |                                                                                                                                                                                                                                                                                                                                                                                                                                                                                                                                                                                                                     |
|-------------------------------|---------------------------------------------------------------------------------------------------------------------------------------------------------------------------------------------------------------------------------------------------------------------------------------------------------------------------------------------------------------------------------------------------------------------------------------------------------------------------------------------------------------------------------------------------------------------------------------------------------------------|
| Journal:                      | <i>BMJ Open</i>                                                                                                                                                                                                                                                                                                                                                                                                                                                                                                                                                                                                     |
| Manuscript ID                 | bmjopen-2023-072961                                                                                                                                                                                                                                                                                                                                                                                                                                                                                                                                                                                                 |
| Article Type:                 | Original research                                                                                                                                                                                                                                                                                                                                                                                                                                                                                                                                                                                                   |
| Date Submitted by the Author: | 21-Feb-2023                                                                                                                                                                                                                                                                                                                                                                                                                                                                                                                                                                                                         |
| Complete List of Authors:     | Lor, Yi; University of California Davis,<br>George, Kristen M; University of California Davis, Department Public Health Sciences<br>Gilsanz, Paola; Kaiser Permanente Division of Research,<br>Meunier, Claire; University of California Davis<br>Peterson, Rachel; University of Montana<br>Hayes-Larson, Eleanor; UCLA School of Public Health, Department of Epidemiology<br>Barnes, Lisa; Rush University, Department of Neurological Sciences<br>Mungas, Dan; University of California Davis, Department of Neurology<br>Whitmer, Rachel; University of California Davis, Department of Public Health Sciences |
| Keywords:                     | EPIDEMIOLOGY, PUBLIC HEALTH, Risk Factors, Aging                                                                                                                                                                                                                                                                                                                                                                                                                                                                                                                                                                    |
|                               |                                                                                                                                                                                                                                                                                                                                                                                                                                                                                                                                                                                                                     |

SCHOLARONE™  
Manuscripts

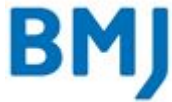

I, the Submitting Author has the right to grant and does grant on behalf of all authors of the Work (as defined in the below author licence), an exclusive licence and/or a non-exclusive licence for contributions from authors who are: i) UK Crown employees; ii) where BMJ has agreed a CC-BY licence shall apply, and/or iii) in accordance with the terms applicable for US Federal Government officers or employees acting as part of their official duties; on a worldwide, perpetual, irrevocable, royalty-free basis to BMJ Publishing Group Ltd ("BMJ") its licensees and where the relevant Journal is co-owned by BMJ to the co-owners of the Journal, to publish the Work in this journal and any other BMJ products and to exploit all rights, as set out in our [licence](#).

The Submitting Author accepts and understands that any supply made under these terms is made by BMJ to the Submitting Author unless you are acting as an employee on behalf of your employer or a postgraduate student of an affiliated institution which is paying any applicable article publishing charge ("APC") for Open Access articles. Where the Submitting Author wishes to make the Work available on an Open Access basis (and intends to pay the relevant APC), the terms of reuse of such Open Access shall be governed by a Creative Commons licence – details of these licences and which [Creative Commons](#) licence will apply to this Work are set out in our licence referred to above.

Other than as permitted in any relevant BMJ Author's Self Archiving Policies, I confirm this Work has not been accepted for publication elsewhere, is not being considered for publication elsewhere and does not duplicate material already published. I confirm all authors consent to publication of this Work and authorise the granting of this licence.

**Journal:** BMJ Open – Original Research

**Title: What is the association between adverse childhood experiences and late-life cognitive decline? Study of Healthy Aging in African Americans (STAR) Cohort Study**

Yi Lor (Corresponding Author), Kristen M. George, Paola Gilsanz, Claire C. Meunier, Rachel L. Peterson, Eleanor Hayes-Larson, Lisa L. Barnes, Dan M. Mungas, Rachel A. Whitmer

**Author Information:**

Yi Lor, MPH (**Corresponding Author**)

- Graduate Group in Epidemiology, University of California
- Email: [yijlor@ucdavis.edu](mailto:yijlor@ucdavis.edu)
- Funding: None
- Conflicts: No conflicts

Kristen M. George, PhD

- Department of Public Health Sciences, University of California Davis School of Medicine
- Email: [krmgeorge@ucdavis.edu](mailto:krmgeorge@ucdavis.edu)
- Funding: N/A
- Conflicts: No conflicts

Paola Gilsanz, ScD, MPH

- Division of Research, Kaiser Permanente Northern California
- Email: [paola.gilsanz@kp.org](mailto:paola.gilsanz@kp.org)
- Funding: RF1AG050782(PI: Whitmer)
- Conflicts: No Conflicts.

Claire C. Meunier, MPH

- Graduate Group in Epidemiology
- Email: [Ccmeunier@ucdavis.edu](mailto:Ccmeunier@ucdavis.edu)
- Conflicts: None

Rachel L. Peterson, PhD, MPH, MA

- School of Public and Community Health Sciences, University of Montana
- Email: [rachel.peterson@mso.umt.edu](mailto:rachel.peterson@mso.umt.edu)
- Funding: NIH/NIA 4R00AG073457-02
- Conflicts: No conflicts.

Eleanor Hayes-Larson, PhD, MPH

- 1  
2  
3 • Department of Epidemiology, UCLA Fielding School of Public Health, Los Angeles,  
4 California, USA  
5  
6 • Email: [ehayeslarson@ucla.edu](mailto:ehayeslarson@ucla.edu)  
7  
8 • Funding: NIA K99AG075317  
9  
10 • Conflicts: No conflicts

11 Lisa L. Barnes, PhD

- 12 • Rush Alzheimer's Disease Center and Department of Neurological Sciences, Rush  
13 University Medical Center  
14  
15 • Email: [Lisa\\_L\\_Barnes@rush.edu](mailto:Lisa_L_Barnes@rush.edu)  
16  
17 • Funding: RF1AG050782(PI: Whitmer)  
18  
19 • Conflicts: No conflicts.

20  
21 Dan Mungas, PhD,

- 22 • Department of Neurology, University of California, Davis, Sacramento, CA, USA  
23  
24 • Email: [dmmungas@ucdavis.edu](mailto:dmmungas@ucdavis.edu)  
25  
26 • Funding: N/A  
27  
28 • Conflicts: No conflicts

29  
30 Rachel A. Whitmer, PhD

- 31 • Department of Public Health Sciences and Neurology, University of California Davis  
32  
33 • Email: [rawhitmer@ucdavis.edu](mailto:rawhitmer@ucdavis.edu)  
34  
35 • RF1AG050782(PI: Whitmer)  
36  
37 • Conflicts: No conflicts  
38  
39  
40  
41  
42  
43  
44  
45  
46  
47  
48  
49  
50  
51  
52  
53  
54  
55  
56  
57  
58  
59  
60

**Abstract (Word count: 290)**

**Objectives:** Adverse childhood experiences (ACEs) are associated with higher risk of chronic disease, but little is known about the association with late life cognitive decline. We examined the longitudinal association between ACEs and late-life cognitive decline in the Study of Healthy Aging in African Americans (STAR).

**Design:** Linear mixed models with random intercepts and slope examined the association of individual and composite ACEs with cognitive change adjusting for years from baseline (timescale), baseline age, sex, parental education, childhood socioeconomic status, and childhood social support. Participants reported whether they had experienced 9 types of ACEs. Executive function and verbal episodic memory were measured up to 3 times over a 3-year period using the Spanish and English Neuropsychological Assessment Scales.

**Settings:** Kaiser Permanente Northern California members living in the Bay Area.

**Participants:** STAR is a cohort study of cognitive aging launched in 2018 that has enrolled 764 Black Americans ages  $\geq 50$  years (mean age=67.5; SD=8.5).

**Results:** Twenty percent of participants reported no ACEs, 23% one ACE, 20% two ACEs, 17% three ACEs, and 17% four or more ACEs. Compared to no ACEs, two ACEs ( $\beta=0.117$ ; 95% CI 0.052-0.182), three ACEs ( $\beta=0.075$ ; 95% CI 0.007-0.153), and 4+ ACEs ( $\beta=0.089$ ; 95% CI 0.002-0.158), were associated with less decline in executive function. There were no significant associations between number of ACEs and baseline or longitudinal verbal episodic memory or between individual ACEs and executive function or verbal episodic memory.

**Conclusion:** In this cohort of older Black Americans, there was no association between ACEs and baseline cognition or cognitive change in verbal episodic memory; however, experiencing  $\geq 2$  ACEs was associated with less decline in executive function. These results may indicate that

1  
2  
3  
4  
5  
6  
7  
8  
9  
10  
11  
12  
13  
14  
15  
16  
17  
18  
19  
20  
21  
22  
23  
24  
25  
26  
27  
28  
29  
30  
31  
32  
33  
34  
35  
36  
37  
38  
39  
40  
41  
42  
43  
44  
45  
46  
47  
48  
49  
50  
51  
52  
53  
54  
55  
56  
57  
58  
59  
60

participants who survived to age 50+ and experienced ACEs may have cognitive resilience that warrants further investigation.

For peer review only

**Strength and Limitations of this study:**

- The impact of adverse childhood experience (ACEs) on late-life cognition in older Black adults is sparse with little research investigating cognitive decline.
- The Study of Healthy Aging in African-Americans (STAR) is a well-characterized cohort of older Black Americans ages 50 years or older with detailed socioeconomic lifecourse information such as education, region of birth, and childhood experiences.
- Repeated assessment of cognition in two domains across three waves (approximately 3 years) using the Spanish and English Assessment Scale (SENAS), a measurement validated in English and Spanish, and in diverse populations.
- Linear mixed models allowing for evaluation of ACEs on cognition and cognitive decline adjusting for childhood confounders such as childhood socioeconomic status and childhood support.
- ACEs assessments were limited to self-report and there were no questions asked of physical or sexual abuse.



## INTRODUCTION

Childhood is a sensitive period in the lifecourse for later-life health outcomes(1,2), such that disruptions during this period can have detrimental effects on development and later life health. Adverse childhood experiences (ACEs) are traumatic events in childhood that include abuse, witnessing violence, and household dysfunction and have been associated with higher risk of cardiovascular diseases, chronic lung disease, and liver disease.(1,2) Although ACEs are associated with many of the risk factors for dementia, only a handful of studies have examined the association between ACEs and poor cognitive aging outcomes in Black Americans.(3)

Some studies indicate that ACEs have negative effects on cognitive functioning later in life.(4–7) Studies examining specific types of ACEs have reported associations between the death of a parent, physical neglect, and emotional abuse experienced during childhood with worse memory later in life.(5,6) Additionally, greater numbers of ACEs are associated with increased risk of developing Alzheimer’s disease and related dementias (ADRD).(8–10) Despite findings of ACEs being associated with poorer memory and higher risk of ADRD, other studies have shown mixed results, with weak to no association of ACEs with change in cognition over time.(11,12) Furthermore, the literature is mixed on the specific impact that ACEs have on late-life cognitive functioning with some ACEs being associated with slower cognitive decline in older Blacks adults but no decline in older White adults.(13,14)

Two interrelated life course theories serve as a framework for understanding how early life exposures, such as ACEs, may affect later life cognitive outcomes. The Cumulative Advantage/Disadvantage (CAD) theory posits that structural and institutional processes contribute to differential access to resources or harmful exposures that accumulate in a non-additive way over time.(15,16) Individuals who are exposed to more ACEs over time will have

1  
2  
3 an increased risk of negative health outcomes, including poor cognition, later in life. Building on  
4 this theory, the Cumulative Inequality (CI) theory incorporates life course factors that take into  
5 consideration the intergenerational, socioeconomic, and stress processes important in the  
6 environment in which a child grows up.(17,18) Both theories recognize that the trajectories  
7 established by negative childhood exposures can be altered by positive experiences throughout  
8 the life course. ACEs may be a predictor of worse outcomes in later life, but positive experiences  
9 such as social support and individual response to adversity may minimize the negative effects on  
10 cognitive outcomes. Due to the relationships between both theories, we will consider them  
11 together as the CI theory.  
12  
13  
14  
15  
16  
17  
18  
19  
20  
21  
22  
23

24 Compared to White Americans, Black Americans have a higher risk of ADRD and report  
25 more ACES.(19–21) However, the relationship between childhood adversity and cognition in  
26 later life among Black adults remains ambiguous.(22–24) The two studies that have examined  
27 ACEs and cognitive outcomes in Black adults have had mixed results.(11,13) One study(11)  
28 examining 427 older Blacks adults found no associations between ACEs and cognition. Another  
29 study(13) among 3700 older Black adults found that those who reported experiencing food  
30 deprivation and having thinner body size than their peers in early life had slower rates of  
31 cognitive decline compared to those who did not report food deprivation or being thinner.  
32  
33  
34  
35  
36  
37  
38  
39  
40  
41

42 The aim of this paper was to examine the association between total number of ACEs as  
43 well as the specific ACEs experienced with cognitive change in a cohort of middle-aged and  
44 older Black adults. To expand the sparse existing literature, we focus on Black individuals and  
45 their early-life experiences.(3) Based on the CI theory, we hypothesize a dose-response  
46 relationship where each additional ACE experienced is associated with faster cognitive decline,  
47 and all types of ACEs predict worse cognitive outcomes.  
48  
49  
50  
51  
52  
53  
54  
55  
56  
57  
58  
59  
60

## METHODS

### Study participants and data collection

The STAR cohort consists of community-dwelling midlife to older Black adults that reside in the San Francisco Bay area of California, primarily the cities of Oakland and Richmond.<sup>(25,26)</sup> STAR aims to evaluate how lifecourse vascular and sociocultural factors influence the trajectory of cognitive aging and burden of cognitive impairment among Black Americans. Individuals eligible for STAR were long-term members of Kaiser Permanente Northern California, an integrated healthcare delivery system, who identified as Black or African American, were age 50 years or older on January 1, 2018, and had previously participated in Kaiser Permanente multiphasic health checkup (MHC) exams between 1964-1985. Stratified random sampling by age and educational attainment was used with the goal of recruiting approximately equal proportions of participants ages 50-64 and 65 and older. Exclusion criteria included electronic medical record diagnosis of dementia or other neurodegenerative diseases (frontotemporal dementia, Lewy body disease, Pick's disease, Parkinson's disease with dementia, Huntington's disease) and presence of health conditions that would impede participation in study interviews (defined by hospice activity in the past 12 months, history of severe chronic obstructive pulmonary disease in the past 6 months, congestive heart failure hospitalizations in the past 6 months, and history of end stage renal disease or dialysis in the past 12 months).

### Measures

#### Cognition

Cognitive function was assessed at each STAR wave using the Spanish and English Neuropsychological Assessment Scales (SENAS), a battery of cognitive tests that have

1  
2  
3 undergone extensive development using item response theory methodology for valid  
4 comparisons of cognition and cognitive change across racial/ethnic and linguistically diverse  
5 groups.(27,28) Cognitive domains of executive function and verbal episodic memory were  
6 derived from the SENAS. Each domain was z-standardized using the mean and standard  
7 deviation from the full baseline sample. Details of the administration procedures, development,  
8 and psychometric characteristics can be found described in-depth elsewhere.(27,28) Cognitive  
9 trajectories were measured across three waves of data approximately 14 months apart totally  
10 over 3 years.

#### 21 Adverse childhood experiences (ACEs)

22  
23  
24 During baseline interviews, participants were asked if they experienced nine separate  
25 types of ACEs during childhood from birth to age 16. ACEs included experiences of parents'  
26 divorce or separation, a parent remarrying, witnessing domestic violence, substance abuse by a  
27 family member, loss of a job by a parent, a parent going to jail, serious illness of a family  
28 member, death of mother, and death of father. ACEs were examined individually and as a  
29 composite ACE score defined as the sum of ACEs reported and recategorized as 0, 1, 2, 3, or 4  
30 or more ACEs. Summation of ACEs models the cumulative effect that is reflective of the CI  
31 theory and cumulative ACEs score from 0 to 4 or more is one of the most commonly used  
32 methods for operationalizing ACEs. Cumulative ACEs score has been found to have a dose-  
33 response association with various health outcomes.(2,29–31) Approximately 2% of participants  
34 (n = 14) had missing ACEs and were excluded from the analyses.

#### 49 Covariates

50  
51 We adjusted for five early-life social support factors that may confound associations  
52 between ACEs and later-life cognition. Using a five level Likert-type scale (1 = None of the  
53  
54  
55  
56  
57  
58  
59  
60

1  
2  
3 time, 2 = A little of the time, 3 = Some of the time, 4 = Most of the time, and 5 = All of the  
4  
5 time), participants were asked: “How often was there someone in whom you could talk to, trust  
6  
7 and confide?” “How often was there someone who showed you love and affection?” “How  
8  
9 often was there someone who could help you with your homework?” “How often was there  
10  
11 someone who encouraged and pushed you to succeed in school?” and “How often did you have  
12  
13 as much contact as you would like with someone you felt close to, someone in whom you could  
14  
15 trust and confide?” The responses were dichotomized with cutoffs between high frequency (All  
16  
17 and most of the time) and low frequency (some, a little, and none of the time). A composite score  
18  
19 was created for early life factor by summation of the five scores (0-20).  
20  
21  
22

23  
24 We additionally adjusted for early life socioeconomic status by including combined  
25  
26 parental education (both parents with less than high school vs at least one parent with high  
27  
28 school graduation or more), self-reported childhood family housing status (mortgage or owned  
29  
30 home vs rental or others), and how often the participant reported going hungry as a child (Never  
31  
32 vs ever). Parental education was reported as highest level of education completed for both  
33  
34 maternal and paternal parent. Both parent’s education was combined into one parental education  
35  
36 and dichotomized as both parents with less than high school diploma, and either one or both  
37  
38 parents with more than high school diploma. If both maternal and paternal education was  
39  
40 missing, parental education was classified as less than a high school diploma, and these  
41  
42 participants demarcated by including a missing indicator covariate in all models.  
43  
44  
45

46  
47 Other covariates included age at baseline interview centered at the mean baseline age,  
48  
49 self-reported gender (male or female), and self-reported educational attainment (collapsed as less  
50  
51 than college degree vs college graduate or more) captured during STAR baseline interviews.  
52  
53  
54  
55  
56  
57  
58  
59  
60

## Statistical analysis

The distribution of demographics, childhood social support, childhood SES indicators, and type of ACEs were estimated overall and stratified by the number of ACEs experienced. Two sets of linear mixed models were used to assess the association of cognition with: 1) composite ACE score and 2) individual ACEs, allowing for random intercept and slope to account for within-person correlation. The models were adjusted for time (as years since baseline) to estimate trajectories across three waves. We sequentially adjusted for covariates in our composite ACEs models by 1) adjusting for baseline, mean-centered age and sex, 2) adjusted for childhood SES indicators, and 3) adjusted for childhood support. For models with individual ACEs, we sequentially adjusted for covariates by 1) adjusting for baseline, mean-centered age, 2) sex, and 3) parental education. Interaction terms for time scale with exposure and covariates were added to each model to measure changes in cognition over time.

From a cohort of 764 participants, we excluded 14 participants for missing information on ACEs, 15 participants for missing early life support and SES covariates, and 16 participants for missing report of gender.

## RESULTS

Our analytic sample consisted of 707 participants with a mean age of 68.6 (SD 8.7) years (range, 53-95 years) of whom 487 (68.9%) were women compared to 220 (31.1%) men (Table 1). About 21% of participants reported no ACE, 23.6% reported one ACEs, 20% reported two ACEs, 17.3% reported three ACEs, and 16.8% reported four or more ACEs. Seventy-nine percent of participants had at least one ACE. The most common ACE reported was experiencing parents' separation or divorce (38.5%), followed by serious family illness (35.4%), and witnessing domestic violence (31.5%). More than a third (35.5%) of participants had a college

1  
2  
3 degree or higher, and 38% of participants had parents with more than a high school-level  
4 education (Table 1). Participants in this cohort generally had high levels of support (average  
5 composite score of 15.8 and SD = 4.7) during childhood with majority of participants reporting  
6 someone they could trust (76%), someone to love them (86%), someone to help with homework  
7 (66%), someone to motivate or encourage in school (79%), and someone to close they could  
8 contact (77%) all or most of the time. Most participants self-reported as being well-off or above  
9 average financially during childhood (68%), and most participants never experienced childhood  
10 hunger (92%). 75% of participants had only two waves of cognitive measures, and over 83% of  
11 participants had all three waves of cognitive measures.

### 22 **Composite number of ACEs**

23  
24  
25  
26 In our linear mixed models examining associations between the composite ACEs and  
27 baseline executive function (Table 2), we observed a negative non-significant associations for  
28 one ACE ( $\beta = -0.130$ ; 95% CI -0.316 to 0.055), two ACEs ( $\beta = -0.039$ ; 95% CI -0.231 to 0.152)  
29 and 4+ ACEs ( $\beta = -0.025$ ; 95% CI -0.228 to 0.178), and a positive non-significant association for  
30 three ACEs ( $\beta = 0.008$ ; 95% CI -0.193 to 0.209) compared to no ACEs. After adjusting for  
31 childhood SES, the estimates decreased for one ACE ( $\beta = -0.090$ ; 95% CI -0.272 to 0.093),  
32 increased for three ACEs ( $\beta = 0.070$ ; 95% CI -0.132 to 0.271), and changed direction for two  
33 ACEs ( $\beta = 0.008$ ; 95% CI -0.181 to 0.197) and 4+ ACEs ( $\beta = 0.052$ ; 95% CI -0.155 to 0.259)  
34 suggesting a non-significant positive association with baseline executive function. The estimates  
35 were attenuated after further adjusting for childhood support. We observed a non-significant  
36 negative association between composite ACEs and baseline verbal episodic memory for one  
37 ACE ( $\beta = -0.137$ ; 95% CI -0.321 to 0.048), two ACEs ( $\beta = -0.041$ ; 95% CI -0.231 to 0.149) and  
38 three ACEs ( $\beta = -0.120$ ; 95% CI -0.320 to 0.080), but positive association for 4+ ACEs ( $\beta =$   
39  
40  
41  
42  
43  
44  
45  
46  
47  
48  
49  
50  
51  
52  
53  
54  
55  
56  
57  
58  
59  
60

1  
2  
3 0.105; 95% CI -0.097 to 0.307). After adjusting for childhood SES, and childhood support, point  
4 estimates for the association between ACEs and baseline verbal episodic memory were  
5  
6 attenuated.  
7  
8  
9

10 When examined longitudinally, there was significantly slower decline in executive  
11 function among those who reported experiencing two ACEs ( $\beta=0.117$ ; 95% CI 0.052 to 0.182),  
12 three ACEs ( $\beta=0.075$ ; 95% CI 0.007 to 0.153), and four or more ACEs ( $\beta=0.089$ ; 95% CI 0.002  
13 to 0.158), but not for one ACE ( $\beta=0.053$ ; 95% CI -0.010 to 0.116) compared to no ACEs (Table  
14 2, Figure 1). The estimates and direction of associations remained consistent after adjusting for  
15 childhood SES and childhood social support variables (Table 2).  
16  
17  
18  
19  
20  
21  
22  
23

24 There were no significant associations between the composite ACEs score and verbal  
25 episodic memory over time. However, the point estimates were negative for one ACE ( $\beta=-0.017$ ;  
26 95% CI -0.108 to 0.075) and 4+ ACEs ( $\beta=-0.022$ ; 95% CI -0.123 to 0.078), and point estimates  
27 were positive for two ACEs ( $\beta=0.074$ ; 95% CI -0.021 to 0.159) and three ACEs ( $\beta=0.050$ ; 95%  
28 CI -0.048 to 0.148) compared to no ACEs (Table 2). The longitudinal point estimates changed  
29 minimally after adjusting for parental education, childhood hunger, childhood housing, and  
30 childhood social support.  
31  
32  
33  
34  
35  
36  
37  
38  
39

#### 40 **Individual ACEs**

41  
42 When evaluating linear mixed models for executive function and verbal episodic memory  
43 with individual ACEs as predictors, there were no significant associations with baseline  
44 cognition or change of cognition over time (Supplemental Table 1). All individual ACEs had  
45 non-significant positive associations for executive function, except for death of mother which  
46 had non-significant negative association. Longitudinal estimates for verbal episodic memory  
47 were mixed with non-significant positive associations for parent separated, parent remarried,  
48  
49  
50  
51  
52  
53  
54  
55  
56  
57  
58  
59  
60



1  
2  
3 serious family illness, death of mother, and death of father, while non-significant negative  
4  
5 associations were observed for witnessed violence, substance abuse, loss of job, and parent jail.  
6  
7  
8  
9

## 10 **DISCUSSION**

11  
12 In a cohort of older Black Americans, ACEs was not significantly associated with  
13  
14 baseline executive function or verbal episodic memory. We found that those who experienced  
15  
16 multiple ACEs had slower decline in executive function than those who did not experience any  
17  
18 ACEs, but we did not see this for verbal episodic memory. We observed no associations between  
19  
20 individual ACEs and cognition at baseline or over time. Our findings did not align with our  
21  
22 hypothesis that exposure to ACEs would be associated with lower baseline cognition and greater  
23  
24 cognitive decline. These results are consistent with some prior work; similar results were  
25  
26 observed in the Chicago Health and Aging Project (CHAP) cohort study of over 3700 older  
27  
28 Black adults (average age 78 years old) where those that experienced food deprivation had  
29  
30 slower cognitive decline later in life.(13) Our study included a younger cohort of Black  
31  
32 Americans (average age 68 years old) compared to Barnes et al(13), on childhood adversity and  
33  
34 cognition. In another cross sectional study, no associations were found between composite and  
35  
36 individual ACEs across different ages of childhood with baseline cognition within Black older  
37  
38 adults when stratified by race.(11) There is limited work on early life adversity and late-life  
39  
40 cognition in the Black American population, and findings in our study, using an all-Black cohort,  
41  
42 show similar results to previous work in this area.  
43  
44  
45  
46  
47  
48

49 Our study had several strengths. First, we utilized data from a well-characterized cohort  
50  
51 of mid- to late-life Black participants. By evaluating ACEs in an all-Black cohort, we were able  
52  
53 to identify early life experiences within this understudied group and assess relationships between  
54  
55  
56  
57  
58  
59  
60

1  
2  
3 ACEs and late-life cognition using a within-group analysis, an approach that is not typically used  
4 in studies of minoritized older adults.(3,32) Second, we examined cognition using a robust  
5  
6 psychometric battery that has specifically been validated for use in Black Americans.(27,28) By  
7  
8 following our cohort over three waves (average 2.3 years of follow-up), we were able to examine  
9  
10 changes in cognition over time. Lastly, our ACEs questionnaire was adapted from a robust  
11  
12 measure used in other cohort studies with diverse participants.(11,33)  
13  
14  
15

16  
17 There were several limitations in our study. First, since ACEs occurred early in life,  
18  
19 recall bias could influence responses. Older participants were asked to remember potentially  
20  
21 traumatic events during childhood, which could lead to under- or overestimation of the  
22  
23 prevalence of ACEs.(31,34) Social desirability bias may also prevent participants from  
24  
25 disclosing sensitive and revealing information about their early life.(35) Experiences of abuse or  
26  
27 neglect not captured by the ACEs questionnaire, but reflect other dimensions of childhood  
28  
29 adversity, may have different effects on late-life cognition.(36) Finally, as a middle-age and  
30  
31 older cohort with a short follow-up time of approximately 3 years, this study cannot examine  
32  
33 how ACES impact long-term cognitive decline, but this will be examined with additional  
34  
35 cognitive assessments.  
36  
37  
38  
39

40 ACEs were highly prevalent in our cohort with close to 80% experiencing at least one or  
41  
42 more ACEs. We observed that experiencing ACEs was associated with slower decline in  
43  
44 executive function, but not verbal episodic memory, indicating possible domain-specificity. A  
45  
46 meta-analysis of ACES and late-life cognition found that the associations between ACEs and  
47  
48 cognition varied by individual ACEs and type of cognitive outcome.(14) For example, some  
49  
50 studies reported association of ACEs with lower cognitive scores and higher risk of  
51  
52 neurocognitive disorder (NCD) diagnosis, while other studies found association of physical or  
53  
54  
55  
56  
57  
58  
59  
60

1  
2  
3 sexual abuse with better cognition, parental death with lower risk of NCD, and collective  
4 violence with better global cognition.(14) Our analysis did not find significant associations of  
5 individual ACEs with cognitive decline in any domain. Although ACEs could influence a child's  
6 development into adulthood through increased toxic stress pathways, these experiences may only  
7 partially contribute to cognitive functioning in late life.(3,37) Beyond cognition, other studies  
8 have shown that ACEs are associated with higher risk of cardiovascular disease, shortened  
9 telomeres, and greater functional limitations in Black adults.(38–40) Environmental, social, and  
10 behavioral factors throughout a person's life stand to mediate and even protect against the  
11 negative, long-term effects of ACEs.(6,23) In Ritchie et al(6), positive childhood environment  
12 was found to promote executive functioning. Educational attainment could also be protective for  
13 later-life cognitive function through cognitive reserve.(24) Our cohort was highly educated and  
14 reported a high prevalence of childhood support which could explain why ACES were not  
15 associated with lower baseline cognition.

16  
17 The Cumulative Inequity (CI) theory provides as a meaningful framework for explaining  
18 the observed relationships in our study. One possibility for our findings is that it reflects a pattern  
19 of resiliency. Among those who experienced ACEs, many had parents who were separated or  
20 divorced (39%), had family members with serious illness (35%), or witnessed domestic violence  
21 (32%). CI theory suggests that the detrimental, cumulative impact of experiencing multiple  
22 ACEs may have been modified by other factors, such as human agency or social support.(18)  
23 Most participants reported receiving support during childhood all or most of the time and 76%  
24 reported having someone they trust or confide in, 86% having someone show them loved, 66%  
25 having someone help with homework, 79% having someone to motivate them in school, and  
26 77% having someone close to them that they can contact. In a literature review on ACEs and

1  
2  
3 cognitive change in Black Americans, multiple studies continually found that lower SES was  
4 associated faster aging(3), which may in part explain why our cohort with relatively high  
5  
6 childhood SES does not have significant cognitive decline due to aging despite experiencing  
7  
8 higher ACEs. Another explanation for our findings is resiliency through selection and survival  
9  
10 bias which may include only the healthiest individuals that chose to participate in the study.  
11  
12 Black participants in STAR may be exceptional in that they overcame the negative effects of  
13  
14 early childhood adversity, survived long enough, and were healthy enough to enroll in a study on  
15  
16 cognitive aging. It is also important to consider that STAR consists of older Black individuals  
17  
18 who's early life corresponded with de jure and de facto policies that upheld and endorsed racism  
19  
20 in education, access to healthcare, socioeconomic status, and discrimination, which may further  
21  
22 affirm only the most resilient individuals had the opportunity to live into old age.(41)  
23  
24  
25  
26  
27

28 Our findings suggest that experiencing ACEs was not associated with worse cognition or  
29  
30 cognitive decline in this cohort of older Black Americans. Additionally, the accumulation of  
31  
32 ACEs may be associated with slower decline in executive function, a finding that needs to be  
33  
34 explored further. CI theory posits that early life adversities do not fully determine cognitive  
35  
36 trajectories in older adults and resiliency may subsequently develop through midlife and later  
37  
38 life. Future studies are needed to understand how resiliency factors such as childhood support,  
39  
40 education, and financial stability can be protective against ACEs as well as cognitive decline,  
41  
42 especially among marginalized and high-risk communities.  
43  
44  
45  
46  
47  
48  
49  
50  
51  
52  
53  
54  
55  
56  
57  
58  
59  
60

**BMJ Open**

**The original protocol for the study**, as a supplementary file.

**Funding:** This work was supported by National Institutes of Health grant number RF1 AG050782

**Competing Interests:** None declared

**Author Contributions:** YL, KMG, PG, RLP, CCM, EHL, LLB, DMM and RAW were all involved with study design, data collection, data analysis, and reporting the results. STAR participants for providing their data for this research. All authors revised, approved final version of the manuscript, and agree to accept responsibility of all aspects of the work.

**Patient Consent for Publications:** Not required

**Patients and Public Involvement:** Patients or the public were not involved in the design, or conduct, or reporting, or dissemination plans of our research.

**Word count:** 3471 (Limit: 4000)

**Ethics Approval:** The Study of Healthy Aging in African Americans (STAR) was approved by Kaiser Permanente Northern California Institutional Review Board (IRB Number: 1121043)

**Data availability statement:** Data are available upon reasonable request. Data may be obtained from a third party and are not publicly available. Deidentified data are available to qualified investigators from the STAR Leadership Committee on approval for the purposes of replicating procedures and results.

## Bibliography

1. Felitti VJ. Adverse childhood experiences and adult health. *Acad Pediatr*. 2009 Jun;9(3):131–2.
2. Felitti VJ, Anda RF, Nordenberg D, Williamson DF, Spitz AM, Edwards V, et al. Relationship of Childhood Abuse and Household Dysfunction to Many of the Leading Causes of Death in Adults. *Am J Prev Med*. 1998 May;14(4):245–58.
3. Graham KL, Paun O, Stillerman A. The Impact of Adverse Childhood Experiences on Cognition in African American Older Adults: An Integrated Literature Review. *Res Gerontol Nurs*. 2021 Oct;14(5):265–72.
4. Kobayashi LC, Farrell MT, Payne CF, Mall S, Montana L, Wagner RG, et al. Adverse childhood experiences and domain-specific cognitive function in a population-based study of older adults in rural South Africa. *Psychol Aging*. 2020 Sep;35(6):818–30.
5. Majer M, Nater UM, Lin JMS, Capuron L, Reeves WC. Association of childhood trauma with cognitive function in healthy adults: a pilot study. *BMC Neurol*. 2010 Jul 14;10:61.
6. Ritchie K, Jaussent I, Stewart R, Dupuy AM, Courtet P, Malafosse A, et al. Adverse childhood environment and late-life cognitive functioning. *Int J Geriatr Psychiatry*. 2011 May;26(5):503–10.
7. Yang L, Wang Z. Early-Life Conditions and Cognitive Function in Middle-and Old-Aged Chinese Adults: A Longitudinal Study. *Int J Environ Res Public Health*. 2020 May 15;17(10).
8. Donley GAR, Lönnroos E, Tuomainen TP, Kauhanen J. Association of childhood stress with late-life dementia and Alzheimer's disease: the KIHD study. *Eur J Public Health*. 2018 Dec 1;28(6):1069–73.
9. Radford K, Delbaere K, Draper B, Mack HA, Daylight G, Cumming R, et al. Childhood Stress and Adversity is Associated with Late-Life Dementia in Aboriginal Australians. *Am J Geriatr Psychiatry Off J Am Assoc Geriatr Psychiatry*. 2017 Oct;25(10):1097–106.
10. Tani Y, Fujiwara T, Kondo K. Association Between Adverse Childhood Experiences and Dementia in Older Japanese Adults. *JAMA Netw Open*. 2020 Feb 5;3(2):e1920740.
11. Gold AL, Meza E, Ackley SF, Mungas DM, Whitmer RA, Mayeda ER, et al. Are adverse childhood experiences associated with late-life cognitive performance across racial/ethnic groups: results from the Kaiser Healthy Aging and Diverse Life Experiences study baseline. *BMJ Open*. 2021 Feb 5;11(2):e042125.
12. O'Shea BQ, Demakakos P, Cadar D, Kobayashi LC. Adverse Childhood Experiences and Rate of Memory Decline From Mid to Later Life: Evidence From the English Longitudinal Study of Ageing. *Am J Epidemiol*. 2021 Jul 1;190(7):1294–305.

13. Barnes LL, Wilson RS, Everson-Rose SA, Hayward MD, Evans DA, Mendes de Leon CF. Effects of early-life adversity on cognitive decline in older African Americans and whites. *Neurology*. 2012 Dec 11;79(24):2321–7.
14. Patel P, Oremus M. The association between adverse childhood experiences and late-life cognition: A systematic review of cross-sectional and case-control studies. *The Gerontologist*. 2022 Mar 22;gnac041.
15. Dannefer D. Cumulative Advantage/Disadvantage and the Life Course: Cross-Fertilizing Age and Social Science Theory. *J Gerontol Ser B*. 2003 Nov 1;58(6):S327–37.
16. Yang MS, Hedeker D. A life-span approach to examining older vulnerable population's subjective well-being: the role of adversity and trauma. *Aging Ment Health*. 2020 Dec 1;24(12):2043–52.
17. Ferraro KF, Schafer MH, Wilkinson LR. Childhood Disadvantage and Health Problems in Middle and Later Life: Early Imprints on Physical Health? *Am Sociol Rev*. 2016 Feb 1;81(1):107–33.
18. Ferraro KF, Shippee TP. Aging and Cumulative Inequality: How Does Inequality Get Under the Skin? *The Gerontologist*. 2009 Jun;49(3):333–43.
19. Giano Z, Wheeler DL, Hubach RD. The frequencies and disparities of adverse childhood experiences in the U.S. *BMC Public Health* [Internet]. 2020 Sep 10 [cited 2021 Jan 29];20. Available from: <https://www.ncbi.nlm.nih.gov/pmc/articles/PMC7488299/>
20. Maguire-Jack K, Lanier P, Lombardi B. Investigating racial differences in clusters of adverse childhood experiences. *Am J Orthopsychiatry*. 2020;90(1):106–14.
21. Merrick MT, Ford DC, Ports KA, Guinn AS. Prevalence of Adverse Childhood Experiences From the 2011-2014 Behavioral Risk Factor Surveillance System in 23 States. *JAMA Pediatr*. 2018 Nov;172(11):1038–44.
22. Mayeda ER, Glymour MM, Quesenberry CP, Whitmer RA. Inequalities in dementia incidence between six racial and ethnic groups over 14 years. *Alzheimers Dement J Alzheimers Assoc*. 2016 Mar;12(3):216–24.
23. Peterson RL, Fain MJ, Butler EA, Ehiri JE, Carvajal SC. The role of social and behavioral risk factors in explaining racial disparities in age-related cognitive impairment: a structured narrative review. *Aging Neuropsychol Cogn*. 2020 Mar 3;27(2):173–96.
24. Weuve J, Barnes LL, Mendes de Leon CF, Rajan KB, Beck T, Aggarwal NT, et al. Cognitive Aging in Black and White Americans: Cognition, Cognitive Decline, and Incidence of Alzheimer Disease Dementia. *Epidemiol Camb Mass*. 2018 Jan;29(1):151–9.
25. George KM, Gilsanz P, Peterson RL, Barnes LL, DeCarli CS, Mayeda ER, et al. Impact of Cardiovascular Risk Factors in Adolescence, Young Adulthood, and Midlife on Late-Life



- Cognition: Study of Healthy Aging in African Americans. *J Gerontol Ser A*. 2021 Sep 1;76(9):1692–8.
26. Whitmer RA, Barnes LL, Richards AE, Miles S, Mayeda ER, Glymour MM, et al. Introducing the Study of Healthy Aging in African Americans (STAR): Looking back to move forward. *Alzheimers Dement*. 2020;16(S10):e046614.
27. Mungas D, Reed BR, Crane PK, Haan MN, González H. Spanish and English Neuropsychological Assessment Scales (SENAS): further development and psychometric characteristics. *Psychol Assess*. 2004 Dec;16(4):347–59.
28. Mungas DM, Reed BR, Haan MN, Gonzalez H. Spanish and English Neuropsychological Assessment Scales: Relationship to demographics, language, cognition, and independent function. *Neuropsychology*. 2005 Jul;19(4):466–75.
29. Anda RF, Felitti VJ, Bremner JD, Walker JD, Whitfield C, Perry BD, et al. The enduring effects of abuse and related adverse experiences in childhood. *Eur Arch Psychiatry Clin Neurosci*. 2006 Apr;256(3):174–86.
30. Campbell TL. Screening for Adverse Childhood Experiences (ACEs) in Primary Care: A Cautionary Note. *JAMA*. 2020 Jun 16;323(23):2379–80.
31. Lacey RE, Minnis H. Practitioner Review: Twenty years of research with adverse childhood experience scores – Advantages, disadvantages and applications to practice. *J Child Psychol Psychiatry*. 2020;61(2):116–30.
32. Whitfield KE, Allaire JC, Belue R, Edwards CL. Are Comparisons the Answer to Understanding Behavioral Aspects of Aging in Racial and Ethnic Groups? *J Gerontol B Psychol Sci Soc Sci*. 2008 Sep;63(5):P301–8.
33. Howard VJ, McClure LA, Glymour MM, Cunningham SA, Kleindorfer DO, Crowe M, et al. Effect of duration and age at exposure to the Stroke Belt on incident stroke in adulthood. *Neurology*. 2013 Apr 30;80(18):1655–61.
34. Briggs EC, Amaya-Jackson L, Putnam KT, Putnam FW. All adverse childhood experiences are not equal: The contribution of synergy to adverse childhood experience scores. *Am Psychol*. 2021 Mar;76(2):243–52.
35. Althubaiti A. Information bias in health research: definition, pitfalls, and adjustment methods. *J Multidiscip Healthc*. 2016 May 4;9:211–7.
36. Krinner LM, Warren-Findlow J, Bowling J, Issel LM, Reeve CL. The dimensionality of adverse childhood experiences: A scoping review of ACE dimensions measurement. *Child Abuse Negl*. 2021 Nov 1;121:105270.
37. Morsy L, Rothstein R. Toxic stress and children’s outcomes. *Econ Policy Inst* [Internet]. 2019 May 1; Available from: <https://www.epi.org/publication/toxic-stress-and-childrens->



1  
2  
3 outcomes-african-american-children-growing-up-poor-are-at-greater-risk-of-disrupted-  
4 physiological-functioning-and-depressed-academic-achievement/  
5

- 6  
7 38. Kliewer W, Robins JL. Adverse Childhood Experiences Are Associated with  
8 Cardiometabolic Risk Indicators and Telomere Length in Low-Income African-American  
9 Adolescents. *Int J Behav Med*. 2022 Feb;29(1):131–5.  
10  
11 39. Islam SJ, Hwan Kim J, Joseph E, Topel M, Baltrus P, Liu C, et al. Association Between  
12 Early Trauma and Ideal Cardiovascular Health Among Black Americans: Results From the  
13 Morehouse-Emory Cardiovascular (MECA) Center for Health Equity. *Circ Cardiovasc Qual*  
14 *Outcomes*. 2021 Sep;14(9):e007904.  
15  
16 40. Sauerteig MR, Ferraro KF, Bauldry S. Life Course Stressors and Functional Limitations in  
17 Later Life Among White, Black, and Hispanic Adults: Deleterious, Hardening, or Benign? *J*  
18 *Gerontol B Psychol Sci Soc Sci*. 2022 Jan 12;77(1):249–59.  
19  
20 41. Glymour MM, Manly JJ. Lifecourse social conditions and racial and ethnic patterns of  
21 cognitive aging. *Neuropsychol Rev*. 2008 Sep;18(3):223–54.  
22  
23  
24  
25  
26  
27  
28  
29  
30  
31  
32  
33  
34  
35  
36  
37  
38  
39  
40  
41  
42  
43  
44  
45  
46  
47  
48  
49  
50  
51  
52  
53  
54  
55  
56  
57  
58  
59  
60

Table 1: Baseline characteristics stratified by number of Adverse Childhood Experiences (ACEs), STAR

| Characteristic                                    | Overall Sample                                 | 0 ACEs     | 1 ACE      | 2 ACEs     | 3 ACEs     | 4+ ACEs    |
|---------------------------------------------------|------------------------------------------------|------------|------------|------------|------------|------------|
|                                                   | <b>N (%) or Mean (SD)</b>                      |            |            |            |            |            |
| <b>Number of Participants</b>                     | 707 (100)                                      | 151 (21.4) | 167 (23.6) | 148 (20.0) | 122 (17.3) | 119 (16.8) |
| <b>Baseline Age</b>                               | 68.6 (8.7)                                     | 69.1 (8.2) | 69.0 (8.4) | 68.9 (9.2) | 68.8 (9.6) | 66.7 (8.2) |
| <b>Gender: Male</b>                               | 220 (31.1)                                     | 46 (30.5)  | 56 (33.5)  | 51 (34.5)  | 38 (31.2)  | 29 (24.4)  |
| College graduate or more                          | 252 (35.6)                                     | 51 (33.8)  | 60 (35.9)  | 54 (36.5)  | 44 (36.1)  | 43 (36.1)  |
| <b>Parent education: More than high school</b>    | 267 (37.8)                                     | 63 (41.7)  | 59 (35.3)  | 54 (36.5)  | 43 (35.3)  | 48 (40.3)  |
| <b>ACEs</b>                                       | <b>N (column % per variables)</b>              |            |            |            |            |            |
| Parents were separated or divorced                | 272 (38.5)                                     | 0          | 30 (18.0)  | 63 (42.6)  | 73 (59.8)  | 106 (89.1) |
| Serious illness of a family member                | 250 (35.4)                                     | 0          | 44 (26.4)  | 67 (45.3)  | 64 (52.5)  | 75 (63.0)  |
| Witnessed domestic violence                       | 223 (31.5)                                     | 0          | 37 (22.2)  | 41 (27.7)  | 60 (49.2)  | 85 (71.4)  |
| Substance abuse by a family member                | 172 (24.3)                                     | 0          | 18 (10.8)  | 35 (23.7)  | 41 (33.6)  | 78 (65.6)  |
| Parent remarried                                  | 176 (24.9)                                     | 0          | 2 (1.2)    | 39 (26.4)  | 58 (47.6)  | 77 (64.7)  |
| Loss of job by a parent                           | 106 (15.0)                                     | 0          | 23 (13.8)  | 19 (12.8)  | 23 (18.9)  | 41 (34.5)  |
| Death of your father                              | 70 (9.9)                                       | 0          | 8 (4.8)    | 18 (12.2)  | 19 (15.6)  | 25 (21.0)  |
| Parent had to go to jail                          | 53 (7.5)                                       | 0          | 2 (1.2)    | 4 (2.7)    | 10 (8.2)   | 37 (31.1)  |
| Death of your mother                              | 42 (5.9)                                       | 0          | 3 (1.8)    | 10 (6.8)   | 18 (14.8)  | 11 (9.2)   |
| <b>Childhood Social Support</b>                   | <b>N (column % per variables) or Mean (SD)</b> |            |            |            |            |            |
| Composite childhood support                       | 15.8 (4.7)                                     | 17.1 (4.2) | 16.4 (4.3) | 15.3 (4.7) | 14.5 (4.8) | 14.9 (5.1) |
| Someone to trust and confide in all to most times | 537 (75.7)                                     | 125 (82.8) | 136 (81.4) | 104 (70.3) | 87 (71.3)  | 83 (69.8)  |
| Someone to love all to most times                 | 611 (86.4)                                     | 143 (94.7) | 149 (89.2) | 125 (84.5) | 96 (78.7)  | 98 (82.4)  |

|                                                          |                                   |            |            |            |            |            |
|----------------------------------------------------------|-----------------------------------|------------|------------|------------|------------|------------|
| Someone to help with homework all to most times          | 466 (65.9)                        | 121 (80.1) | 118 (70.6) | 91 (61.49) | 65 (53.3)  | 71 (59.1)  |
| Someone to motivate and encourage school                 | 559 (79.1)                        | 135 (89.4) | 145 (86.8) | 107 (72.3) | 87 (71.3)  | 85 (71.4)  |
| Had contact with someone felt close to all or most times | 547 (77.4)                        | 126 (83.4) | 138 (82.6) | 112 (75.7) | 87 (71.3)  | 84 (70.6)  |
| <b>Childhood Socioeconomic Status</b>                    | <b>N (column % per variables)</b> |            |            |            |            |            |
| Family financially well-off or above average             | 483 (68.3)                        | 125 (82.8) | 120 (71.9) | 101 (68.2) | 70 (57.4)  | 67 (56.3)  |
| Never hungry during childhood                            | 650 (91.9)                        | 146 (96.7) | 157 (94.0) | 131 (88.5) | 110 (90.2) | 106 (89.1) |
| Family had a mortgage or owned a home during childhood   | 444 (62.8)                        | 118 (78.2) | 111 (66.5) | 94 (63.5)  | 65 (53.3)  | 56 (47.1)  |

ACEs: Adverse Childhood Experiences

SD: Standard Deviation

Table 2: Linear mixed models estimate of the association of composite adverse childhood experiences (ACEs) with domain-specific cognition across 3 waves

|                            | Executive Function      |                        |                         | Verbal Episodic Memory  |                        |                        |
|----------------------------|-------------------------|------------------------|-------------------------|-------------------------|------------------------|------------------------|
|                            | Model 1                 | Model 2                | Model 3                 | Model 1                 | Model 2                | Model 3                |
|                            | $\beta$ (95% CI)        | $\beta$ (95% CI)       | $\beta$ (95% CI)        | $\beta$ (95% CI)        | $\beta$ (95% CI)       | $\beta$ (95% CI)       |
| <b>Years from baseline</b> | -0.071 (-0.119, -0.023) | -0.084 (-0.137, -0.03) | -0.119 (-0.222, -0.016) | -0.078 (-0.148, -0.009) | -0.108 (-0.185, -0.03) | -0.170 (-0.319, -0.02) |
|                            | <b>Baseline</b>         |                        |                         |                         |                        |                        |
| <b>ACEs</b>                |                         |                        |                         |                         |                        |                        |
| 0                          | ref                     | ref                    | ref                     | ref                     | ref                    | ref                    |
| 1                          | -0.130 (-0.316, 0.055)  | -0.090 (-0.272, 0.093) | -0.090 (-0.273, 0.092)  | -0.137 (-0.321, 0.048)  | -0.110 (-0.293, 0.073) | -0.111 (-0.294, 0.072) |
| 2                          | -0.039 (-0.231, 0.152)  | 0.008 (-0.181, 0.197)  | 0.006 (-0.184, 0.196)   | -0.041 (-0.231, 0.149)  | -0.010 (-0.198, 0.179) | -0.014 (-0.204, 0.176) |
| 3                          | 0.008 (-0.193, 0.209)   | 0.070 (-0.132, 0.271)  | 0.067 (-0.136, 0.271)   | -0.120 (-0.320, 0.080)  | -0.085 (-0.287, 0.116) | -0.092 (-0.295, 0.111) |
| 4+                         | -0.025 (-0.228, 0.178)  | 0.052 (-0.155, 0.259)  | 0.050 (-0.158, 0.258)   | 0.105 (-0.097, 0.307)   | 0.156 (-0.051, 0.363)  | 0.151 (-0.057, 0.359)  |
|                            | <b>Longitudinal</b>     |                        |                         |                         |                        |                        |
| <b>ACEs</b>                |                         |                        |                         |                         |                        |                        |
| 0                          | ref                     | ref                    | ref                     | ref                     | ref                    | ref                    |
| 1                          | 0.053 (-0.010, 0.116)   | 0.056 (-0.007, 0.119)  | 0.057 (-0.006, 0.120)   | -0.017 (-0.108, 0.075)  | -0.020 (-0.112, 0.072) | -0.019 (-0.11, 0.073)  |
| 2                          | 0.117 (0.052, 0.182)    | 0.125 (0.060, 0.191)   | 0.128 (0.062, 0.194)    | 0.074 (-0.021, 0.169)   | 0.077 (-0.019, 0.173)  | 0.082 (-0.014, 0.178)  |
| 3                          | 0.075 (0.007, 0.143)    | 0.090 (0.021, 0.159)   | 0.094 (0.025, 0.164)    | 0.050 (-0.048, 0.148)   | 0.050 (-0.05, 0.151)   | 0.058 (-0.044, 0.160)  |
| 4+                         | 0.089 (0.020, 0.158)    | 0.108 (0.036, 0.179)   | 0.111 (0.039, 0.182)    | -0.022 (-0.123, 0.078)  | -0.022 (-0.126, 0.082) | -0.017 (-0.121, 0.088) |

Model 1: Adjusted for years from baseline, baseline age centered at mean, and sex,

Model 2: Model 1 + childhood SES

Model 3: Model 2 + composite childhood support

ACEs: Adverse Childhood Experience

1  
2  
3 CI: Confidence Interval  
4  
5  
6  
7  
8

9 *Figure 1: Prediction plot of linear mixed models estimate of the association of composite*  
10 *adverse childhood experiences (ACEs) with executive function across 3 waves*  
11  
12  
13

14 Adjusted for years from baseline, baseline age centered at mean, gender/sex, childhood SES, and  
15 composite childhood support  
16  
17  
18  
19  
20  
21  
22  
23  
24  
25  
26  
27  
28  
29  
30  
31  
32  
33  
34  
35  
36  
37  
38  
39  
40  
41  
42  
43  
44  
45  
46  
47  
48  
49  
50  
51  
52  
53  
54  
55  
56  
57  
58  
59  
60

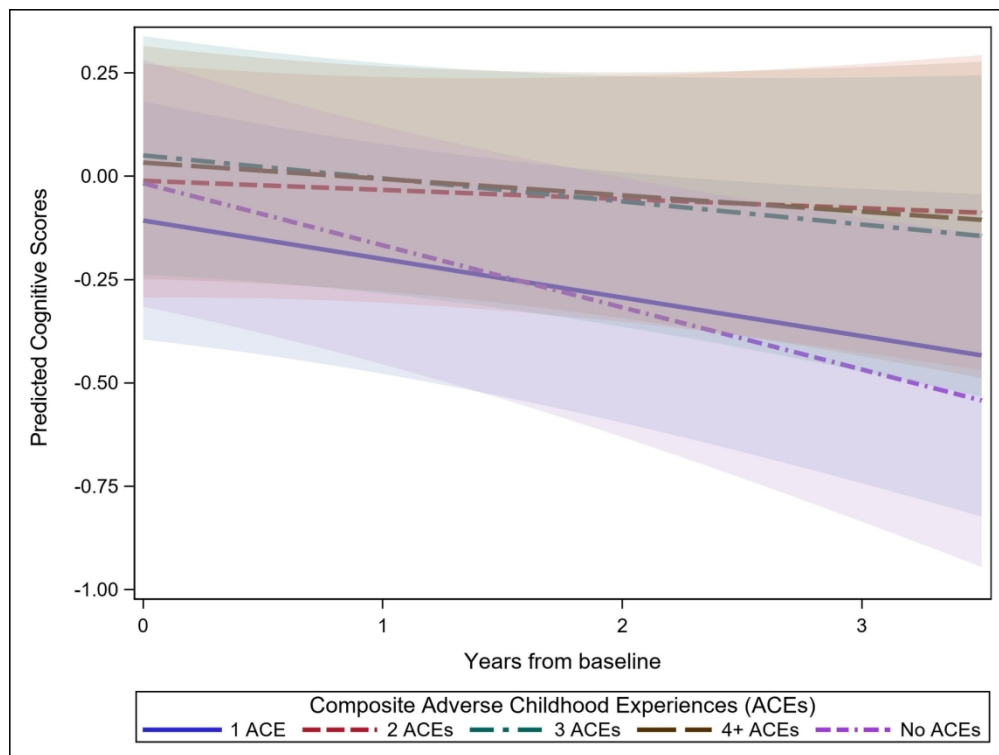

Figure 1: Prediction plot of linear mixed models estimate of the association of composite adverse childhood experiences (ACEs) with executive function across 3 waves

169x127mm (300 x 300 DPI)

Supplemental Figure 1: Prediction plot of linear mixed models estimate for the association of composite adverse childhood experiences (ACEs) with verbal episodic memory across 3 waves

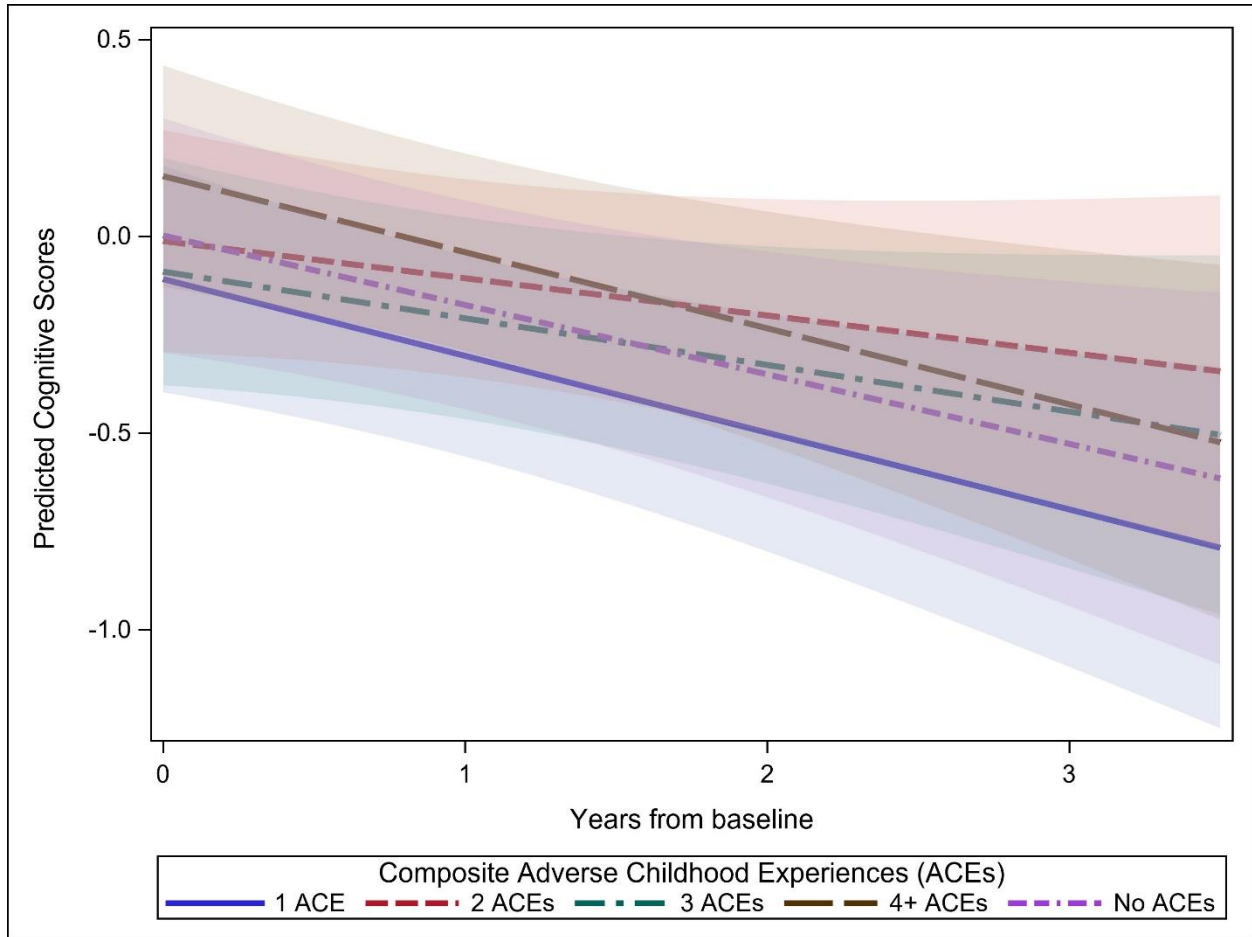

Adjusted for years from baseline, baseline age centered at mean, gender/sex, childhood SES, and composite childhood support

Supplemental Table 1: Linear mixed model with random intercept and slope of the association of individual adverse childhood experiences (ACEs) with domain-specific cognition adjusted for time, gender/sex, and parental education

|                        | Executive Function     |                        |                        | Verbal Episodic Memory |                        |                        |
|------------------------|------------------------|------------------------|------------------------|------------------------|------------------------|------------------------|
|                        | Cross-Sectional        |                        |                        |                        |                        |                        |
|                        | Model 1                | Model 2                | Model 3                | Model 1                | Model 2                | Model 3                |
|                        | $\beta$ (95% CI)       |
| Parent Separated       | -0.035 (-0.166, 0.095) | -0.040 (-0.169, 0.089) | -0.011 (-0.140, 0.118) | -0.006 (-0.140, 0.128) | -0.014 (-0.142, 0.115) | 0.017 (-0.112, 0.147)  |
| Parent Remarried       | -0.007 (-0.152, 0.139) | -0.017 (-0.161, 0.127) | 0.000 (-0.142, 0.142)  | 0.062 (-0.087, 0.212)  | 0.044 (-0.100, 0.188)  | 0.061 (-0.082, 0.203)  |
| Witnessed Violence     | 0.065 (-0.071, 0.200)  | 0.052 (-0.082, 0.186)  | 0.070 (-0.062, 0.201)  | 0.131 (-0.009, 0.270)  | 0.106 (-0.028, 0.240)  | 0.121 (-0.012, 0.253)  |
| Substance Abuse        | 0.118 (-0.029, 0.266)  | 0.126 (-0.02, 0.272)   | 0.119 (-0.025, 0.262)  | 0.096 (-0.056, 0.247)  | 0.111 (-0.035, 0.256)  | 0.107 (-0.037, 0.251)  |
| Loss Job               | 0.014 (-0.162, 0.190)  | 0.007 (-0.167, 0.181)  | 0.034 (-0.137, 0.206)  | 0.029 (-0.152, 0.210)  | 0.016 (-0.158, 0.190)  | 0.033 (-0.139, 0.205)  |
| Parent Jail            | -0.120 (-0.359, 0.118) | -0.116 (-0.352, 0.12)  | -0.064 (-0.298, 0.169) | -0.034 (-0.279, 0.211) | -0.022 (-0.257, 0.213) | 0.020 (-0.214, 0.254)  |
| Serious Family Illness | -0.014 (-0.146, 0.118) | -0.018 (-0.148, 0.112) | -0.011 (-0.139, 0.117) | 0.032 (-0.103, 0.167)  | 0.025 (-0.105, 0.155)  | 0.029 (-0.099, 0.157)  |
| Death Mother           | -0.007 (-0.275, 0.262) | -0.033 (-0.299, 0.233) | -0.028 (-0.289, 0.233) | 0.105 (-0.171, 0.381)  | 0.057 (-0.208, 0.322)  | 0.058 (-0.204, 0.320)  |
| Death Father           | -0.002 (-0.213, 0.209) | -0.006 (-0.215, 0.203) | 0.025 (-0.180, 0.231)  | -0.019 (-0.236, 0.199) | -0.024 (-0.233, 0.185) | -0.002 (-0.209, 0.205) |
|                        | Longitudinal           |                        |                        |                        |                        |                        |
|                        | Model 1                | Model 2                | Model 3                | Model 1                | Model 2                | Model 3                |
|                        | $\beta$ (95% CI)       |
| Parent Separated       | -0.006 (-0.140, 0.128) | -0.014 (-0.142, 0.115) | 0.017 (-0.112, 0.147)  | 0.018 (-0.025, 0.062)  | 0.018 (-0.025, 0.062)  | 0.018 (-0.026, 0.062)  |
| Parent Remarried       | 0.062 (-0.087, 0.212)  | 0.044 (-0.100, 0.188)  | 0.061 (-0.082, 0.203)  | 0.045 (-0.005, 0.094)  | 0.045 (-0.004, 0.095)  | 0.045 (-0.005, 0.094)  |
| Witnessed Violence     | 0.131 (-0.009, 0.270)  | 0.106 (-0.028, 0.240)  | 0.121 (-0.012, 0.253)  | 0.026 (-0.019, 0.072)  | 0.027 (-0.019, 0.072)  | 0.027 (-0.019, 0.072)  |
| Substance Abuse        | 0.096 (-0.056, 0.247)  | 0.111 (-0.035, 0.256)  | 0.107 (-0.037, 0.251)  | 0.034 (-0.016, 0.083)  | 0.033 (-0.016, 0.083)  | 0.033 (-0.016, 0.083)  |
| Loss Job               | 0.029 (-0.152, 0.210)  | 0.016 (-0.158, 0.190)  | 0.033 (-0.139, 0.205)  | 0.004 (-0.055, 0.063)  | 0.004 (-0.055, 0.063)  | 0.003 (-0.055, 0.062)  |
| Parent Jail            | -0.034 (-0.279, 0.211) | -0.022 (-0.257, 0.213) | 0.020 (-0.214, 0.254)  | 0.067 (-0.015, 0.149)  | 0.066 (-0.016, 0.148)  | 0.067 (-0.015, 0.149)  |
| Serious Family Illness | 0.032 (-0.103, 0.167)  | 0.025 (-0.105, 0.155)  | 0.029 (-0.099, 0.157)  | 0.038 (-0.006, 0.082)  | 0.038 (-0.006, 0.082)  | 0.038 (-0.006, 0.083)  |
| Death Mother           | 0.105 (-0.171, 0.381)  | 0.057 (-0.208, 0.322)  | 0.058 (-0.204, 0.320)  | -0.005 (-0.096, 0.087) | -0.005 (-0.096, 0.086) | -0.004 (-0.095, 0.087) |
| Death Father           | -0.019 (-0.236, 0.199) | -0.024 (-0.233, 0.185) | -0.002 (-0.209, 0.205) | 0.005 (-0.067, 0.076)  | 0.006 (-0.066, 0.077)  | 0.004 (-0.067, 0.076)  |



1  
2  
3  
4  
5  
6  
7  
8  
9  
10  
11  
12  
13  
14  
15  
16  
17  
18  
19  
20  
21  
22  
23  
24  
25  
26  
27  
28  
29  
30  
31  
32  
33  
34  
35  
36  
37  
38  
39  
40  
41  
42  
43  
44  
45  
46  
47

Model 1: Adjusted for baseline age centered at mean,  
Model 2: Model 1 + sex,  
Model 3: Model 2 + parental education

For peer review only

STROBE Statement—Checklist of items that should be included in reports of *cohort studies*

|                           | Item No | Recommendation                                                                                                                                                                                    | Page No |
|---------------------------|---------|---------------------------------------------------------------------------------------------------------------------------------------------------------------------------------------------------|---------|
| <b>Title and abstract</b> | 1       | (a) Indicate the study's design with a commonly used term in the title or the abstract                                                                                                            | 1       |
|                           |         | (b) Provide in the abstract an informative and balanced summary of what was done and what was found                                                                                               | 3       |
| <b>Introduction</b>       |         |                                                                                                                                                                                                   |         |
| Background/rationale      | 2       | Explain the scientific background and rationale for the investigation being reported                                                                                                              | 6       |
| Objectives                | 3       | State specific objectives, including any prespecified hypotheses                                                                                                                                  | 7       |
| <b>Methods</b>            |         |                                                                                                                                                                                                   |         |
| Study design              | 4       | Present key elements of study design early in the paper                                                                                                                                           | 8       |
| Setting                   | 5       | Describe the setting, locations, and relevant dates, including periods of recruitment, exposure, follow-up, and data collection                                                                   | 8       |
| Participants              | 6       | (a) Give the eligibility criteria, and the sources and methods of selection of participants. Describe methods of follow-up                                                                        | 8       |
|                           |         | (b) For matched studies, give matching criteria and number of exposed and unexposed                                                                                                               | n/a     |
| Variables                 | 7       | Clearly define all outcomes, exposures, predictors, potential confounders, and effect modifiers. Give diagnostic criteria, if applicable                                                          | 8-10    |
| Data sources/measurement  | 8*      | For each variable of interest, give sources of data and details of methods of assessment (measurement). Describe comparability of assessment methods if there is more than one group              | 8-10    |
| Bias                      | 9       | Describe any efforts to address potential sources of bias                                                                                                                                         | 9-10    |
| Study size                | 10      | Explain how the study size was arrived at                                                                                                                                                         | n/a     |
| Quantitative variables    | 11      | Explain how quantitative variables were handled in the analyses. If applicable, describe which groupings were chosen and why                                                                      | 9-10    |
| Statistical methods       | 12      | (a) Describe all statistical methods, including those used to control for confounding                                                                                                             | 11      |
|                           |         | (b) Describe any methods used to examine subgroups and interactions                                                                                                                               | 11      |
|                           |         | (c) Explain how missing data were addressed                                                                                                                                                       | 11      |
|                           |         | (d) If applicable, explain how loss to follow-up was addressed                                                                                                                                    | n/a     |
|                           |         | (e) Describe any sensitivity analyses                                                                                                                                                             | n/a     |
| <b>Results</b>            |         |                                                                                                                                                                                                   |         |
| Participants              | 13*     | (a) Report numbers of individuals at each stage of study—eg numbers potentially eligible, examined for eligibility, confirmed eligible, included in the study, completing follow-up, and analysed | n/a     |
|                           |         | (b) Give reasons for non-participation at each stage                                                                                                                                              | n/a     |
|                           |         | (c) Consider use of a flow diagram                                                                                                                                                                | n/a     |
| Descriptive data          | 14*     | (a) Give characteristics of study participants (eg demographic, clinical, social) and information on exposures and potential confounders                                                          | 11-12   |
|                           |         | (b) Indicate number of participants with missing data for each variable of interest                                                                                                               | n/a     |
|                           |         | (c) Summarise follow-up time (eg, average and total amount)                                                                                                                                       | 8, 15   |
| Outcome data              | 15*     | Report numbers of outcome events or summary measures over time                                                                                                                                    | 11-12   |

|    |                          |    |                                                                                                                                                                                                              |       |
|----|--------------------------|----|--------------------------------------------------------------------------------------------------------------------------------------------------------------------------------------------------------------|-------|
| 1  | Main results             | 16 | (a) Give unadjusted estimates and, if applicable, confounder-adjusted estimates and their precision (eg, 95% confidence interval). Make clear which confounders were adjusted for and why they were included | 12-13 |
| 2  |                          |    | (b) Report category boundaries when continuous variables were categorized                                                                                                                                    | n/a   |
| 3  |                          |    | (c) If relevant, consider translating estimates of relative risk into absolute risk for a meaningful time period                                                                                             | n/a   |
| 4  |                          |    |                                                                                                                                                                                                              |       |
| 5  | Other analyses           | 17 | Report other analyses done—eg analyses of subgroups and interactions, and sensitivity analyses                                                                                                               | n/a   |
| 6  |                          |    |                                                                                                                                                                                                              |       |
| 7  |                          |    |                                                                                                                                                                                                              |       |
| 8  |                          |    |                                                                                                                                                                                                              |       |
| 9  |                          |    |                                                                                                                                                                                                              |       |
| 10 |                          |    |                                                                                                                                                                                                              |       |
| 11 | <b>Discussion</b>        |    |                                                                                                                                                                                                              |       |
| 12 | Key results              | 18 | Summarise key results with reference to study objectives                                                                                                                                                     | 14    |
| 13 | Limitations              | 19 | Discuss limitations of the study, taking into account sources of potential bias or imprecision. Discuss both direction and magnitude of any potential bias                                                   | 15    |
| 14 |                          |    |                                                                                                                                                                                                              |       |
| 15 | Interpretation           | 20 | Give a cautious overall interpretation of results considering objectives, limitations, multiplicity of analyses, results from similar studies, and other relevant evidence                                   | 15-17 |
| 16 |                          |    |                                                                                                                                                                                                              |       |
| 17 | Generalisability         | 21 | Discuss the generalisability (external validity) of the study results                                                                                                                                        | 16-17 |
| 18 |                          |    |                                                                                                                                                                                                              |       |
| 19 |                          |    |                                                                                                                                                                                                              |       |
| 20 |                          |    |                                                                                                                                                                                                              |       |
| 21 | <b>Other information</b> |    |                                                                                                                                                                                                              |       |
| 22 | Funding                  | 22 | Give the source of funding and the role of the funders for the present study and, if applicable, for the original study on which the present article is based                                                | 18    |
| 23 |                          |    |                                                                                                                                                                                                              |       |
| 24 |                          |    |                                                                                                                                                                                                              |       |
| 25 |                          |    |                                                                                                                                                                                                              |       |

26 \*Give information separately for exposed and unexposed groups.

27  
28  
29 **Note:** An Explanation and Elaboration article discusses each checklist item and gives methodological background and published examples of transparent reporting. The STROBE checklist is best used in conjunction with this article (freely available on the Web sites of PLoS Medicine at <http://www.plosmedicine.org/>, Annals of Internal Medicine at <http://www.annals.org/>, and Epidemiology at <http://www.epidem.com/>). Information on the STROBE Initiative is available at <http://www.strobe-statement.org>.

30  
31  
32  
33  
34  
35  
36  
37  
38  
39  
40  
41  
42  
43  
44  
45  
46  
47  
48  
49  
50  
51  
52  
53  
54  
55  
56  
57  
58  
59  
60

# BMJ Open

## What is the association between adverse childhood experiences and late-life cognitive decline? Study of Healthy Aging in African Americans (STAR) Cohort Study

|                                 |                                                                                                                                                                                                                                                                                                                                                                                                                                                                                                                                                                                                               |
|---------------------------------|---------------------------------------------------------------------------------------------------------------------------------------------------------------------------------------------------------------------------------------------------------------------------------------------------------------------------------------------------------------------------------------------------------------------------------------------------------------------------------------------------------------------------------------------------------------------------------------------------------------|
| Journal:                        | <i>BMJ Open</i>                                                                                                                                                                                                                                                                                                                                                                                                                                                                                                                                                                                               |
| Manuscript ID                   | bmjopen-2023-072961.R1                                                                                                                                                                                                                                                                                                                                                                                                                                                                                                                                                                                        |
| Article Type:                   | Original research                                                                                                                                                                                                                                                                                                                                                                                                                                                                                                                                                                                             |
| Date Submitted by the Author:   | 12-Sep-2023                                                                                                                                                                                                                                                                                                                                                                                                                                                                                                                                                                                                   |
| Complete List of Authors:       | Lor, Yi; University of California Davis, George, Kristen M; University of California Davis, Department Public Health Sciences<br>Gilsanz, Paola; Kaiser Permanente Division of Research, Meunier, Claire; University of California Davis<br>Peterson, Rachel; University of Montana<br>Hayes-Larson, Eleanor; UCLA School of Public Health, Department of Epidemiology<br>Barnes, Lisa; Rush University, Department of Neurological Sciences<br>Mungas, Dan; University of California Davis, Department of Neurology<br>Whitmer, Rachel; University of California Davis, Department of Public Health Sciences |
| <b>Primary Subject Heading</b>: | Epidemiology                                                                                                                                                                                                                                                                                                                                                                                                                                                                                                                                                                                                  |
| Secondary Subject Heading:      | Public health                                                                                                                                                                                                                                                                                                                                                                                                                                                                                                                                                                                                 |
| Keywords:                       | EPIDEMIOLOGY, PUBLIC HEALTH, Risk Factors, Aging                                                                                                                                                                                                                                                                                                                                                                                                                                                                                                                                                              |
|                                 |                                                                                                                                                                                                                                                                                                                                                                                                                                                                                                                                                                                                               |

SCHOLARONE™  
Manuscripts

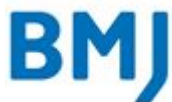

I, the Submitting Author has the right to grant and does grant on behalf of all authors of the Work (as defined in the below author licence), an exclusive licence and/or a non-exclusive licence for contributions from authors who are: i) UK Crown employees; ii) where BMJ has agreed a CC-BY licence shall apply, and/or iii) in accordance with the terms applicable for US Federal Government officers or employees acting as part of their official duties; on a worldwide, perpetual, irrevocable, royalty-free basis to BMJ Publishing Group Ltd ("BMJ") its licensees and where the relevant Journal is co-owned by BMJ to the co-owners of the Journal, to publish the Work in this journal and any other BMJ products and to exploit all rights, as set out in our [licence](#).

The Submitting Author accepts and understands that any supply made under these terms is made by BMJ to the Submitting Author unless you are acting as an employee on behalf of your employer or a postgraduate student of an affiliated institution which is paying any applicable article publishing charge ("APC") for Open Access articles. Where the Submitting Author wishes to make the Work available on an Open Access basis (and intends to pay the relevant APC), the terms of reuse of such Open Access shall be governed by a Creative Commons licence – details of these licences and which [Creative Commons](#) licence will apply to this Work are set out in our licence referred to above.

Other than as permitted in any relevant BMJ Author's Self Archiving Policies, I confirm this Work has not been accepted for publication elsewhere, is not being considered for publication elsewhere and does not duplicate material already published. I confirm all authors consent to publication of this Work and authorise the granting of this licence.

**Journal:** BMJ Open – Original Research

**Title: What is the association between adverse childhood experiences and late-life cognitive decline? Study of Healthy Aging in African Americans (STAR) Cohort Study**

Yi Lor (Corresponding Author), Kristen M. George, Paola Gilsanz, Claire C. Meunier, Rachel L. Peterson, Eleanor Hayes-Larson, Lisa L. Barnes, Dan M. Mungas, Rachel A. Whitmer

**Author Information:**

Yi Lor, MPH (**Corresponding Author**)

- Graduate Group in Epidemiology, University of California
- Email: [yijlor@ucdavis.edu](mailto:yijlor@ucdavis.edu)
- Funding: None
- Conflicts: No conflicts

Kristen M. George, PhD

- Department of Public Health Sciences, University of California Davis School of Medicine
- Email: [krmgeorge@ucdavis.edu](mailto:krmgeorge@ucdavis.edu)
- Funding: N/A
- Conflicts: No conflicts

Paola Gilsanz, ScD, MPH

- Division of Research, Kaiser Permanente Northern California
- Email: [paola.gilsanz@kp.org](mailto:paola.gilsanz@kp.org)
- Funding: NIH RF1AG050782 (PI: Whitmer)
- Conflicts: No conflicts.

Claire C. Meunier, MPH

- Graduate Group in Epidemiology
- Email: [Ccmeunier@ucdavis.edu](mailto:Ccmeunier@ucdavis.edu)
- Funding: None
- Conflicts: No conflicts

Rachel L. Peterson, PhD, MPH, MA

- School of Public and Community Health Sciences, University of Montana
- Email: [rachel.peterson@mso.umt.edu](mailto:rachel.peterson@mso.umt.edu)
- Funding: NIH/NIA 4R00AG073457-02
- Conflicts: No conflicts

Eleanor Hayes-Larson, PhD, MPH

- 1  
2  
3  
4  
5  
6  
7  
8  
9
- Department of Epidemiology, UCLA Fielding School of Public Health, Los Angeles, California, USA
  - Email: [ehayeslarson@ucla.edu](mailto:ehayeslarson@ucla.edu)
  - Funding: NIA K99AG075317
  - Conflicts: No conflicts

10  
11  
12  
13  
14  
15  
16  
17  
18

Lisa L. Barnes, PhD

- Rush Alzheimer's Disease Center and Department of Neurological Sciences, Rush University Medical Center
- Email: [Lisa\\_L\\_Barnes@rush.edu](mailto:Lisa_L_Barnes@rush.edu)
- Funding: RF1AG050782(PI: Whitmer)
- Conflicts: No conflicts

19  
20  
21  
22  
23  
24  
25

Dan Mungas, PhD,

- Department of Neurology, University of California, Davis, Sacramento, CA, USA
- Email: [dmmungas@ucdavis.edu](mailto:dmmungas@ucdavis.edu)
- Funding: N/A
- Conflicts: No conflicts

26  
27  
28  
29  
30  
31  
32  
33  
34  
35  
36  
37  
38  
39  
40  
41  
42  
43  
44  
45  
46  
47  
48  
49  
50  
51  
52  
53  
54  
55  
56  
57  
58  
59  
60

Rachel A. Whitmer, PhD

- Department of Public Health Sciences and Neurology, University of California Davis
- Email: [rawhitmer@ucdavis.edu](mailto:rawhitmer@ucdavis.edu)
- RF1AG050782(PI: Whitmer)
- Conflicts: No conflicts

**Abstract (Word count: 290)**

**Objectives:** Adverse childhood experiences (ACEs) are associated with higher risk of chronic disease, but little is known about the association with late life cognitive decline. We examined the longitudinal association between ACEs and late-life cognitive decline in the Study of Healthy Aging in African Americans (STAR).

**Design:** Linear mixed models with random intercepts and slope examined the association of individual and composite ACEs with cognitive change adjusting for years from baseline (timescale), baseline age, sex, parental education, childhood socioeconomic status, and childhood social support. Participants reported whether they had experienced 9 types of ACEs. Executive function and verbal episodic memory were measured up to 3 times over a 3-year period using the Spanish and English Neuropsychological Assessment Scales.

**Settings:** Kaiser Permanente Northern California members living in the Bay Area.

**Participants:** STAR is a cohort study of cognitive aging launched in 2018 that has enrolled 764 Black Americans ages  $\geq 50$  years (mean age=67.5; SD=8.5).

**Results:** Twenty percent of participants reported no ACEs, 23% one ACE, 20% two ACEs, 17% three ACEs, and 17% four or more ACEs. Compared to no ACEs, two ACEs ( $\beta=0.117$ ; 95% CI 0.052-0.182), three ACEs ( $\beta=0.075$ ; 95% CI 0.007-0.153), and 4+ ACEs ( $\beta=0.089$ ; 95% CI 0.002-0.158), were associated with less decline in executive function. There were no significant associations between number of ACEs and baseline or longitudinal verbal episodic memory or between individual ACEs and executive function or verbal episodic memory.

**Conclusion:** In this cohort of older Black Americans, there was no association between ACEs and baseline cognition or cognitive change in verbal episodic memory; however, experiencing  $\geq 2$  ACEs was associated with less decline in executive function. These results may indicate that



1  
2  
3 participants who survived to age 50+ and experienced ACEs may have cognitive resilience that  
4  
5 warrants further investigation.  
6  
7  
8  
9  
10  
11  
12  
13  
14  
15  
16  
17  
18  
19  
20  
21  
22  
23  
24  
25  
26  
27  
28  
29  
30  
31  
32  
33  
34  
35  
36  
37  
38  
39  
40  
41  
42  
43  
44  
45  
46  
47  
48  
49  
50  
51  
52  
53  
54  
55  
56  
57  
58  
59  
60

For peer review only

**Strength and Limitations of this study:**

- The impact of adverse childhood experiences (ACEs) on late-life cognition in older Black adults is sparse with little research investigating cognitive decline.
- The Study of Healthy Aging in African Americans (STAR) is a well-characterized cohort of older Black Americans ages 50 years or older with detailed socioeconomic lifecourse information such as education, region of birth, and childhood experiences.
- Repeated assessment of cognition in two domains across three waves (approximately 3 years) using the Spanish and English Assessment Scale (SENAS), a measurement validated in English and Spanish, and in diverse populations.
- Linear mixed models allowing for evaluation of ACEs on cognition and cognitive decline adjusting for childhood confounders such as childhood socioeconomic status and childhood support.
- ACEs assessments were limited to self-report and there were no questions asked of physical or sexual abuse.

## INTRODUCTION

Childhood is a sensitive period in the lifecourse for later-life health outcomes(1,2), such that disruptions during this period can have detrimental effects on development and later life health. Adverse childhood experiences (ACEs) are traumatic events in childhood that include abuse, witnessing violence, and household dysfunction and have been associated with higher risk of cardiovascular diseases, chronic lung disease, and liver disease(1,2). Although ACEs are associated with many of the risk factors for dementia, only a handful of studies have examined the association between ACEs and poor cognitive aging outcomes in Black Americans(3).

Cognitive decline and decreased cognitive function are early indicators of Alzheimer's disease and related dementias (ADRD)(4). Signs of these cognitive deficits often includes loss of memory and/or loss of the ability to perform high-level mental skills (executive function) such as planning, and management of thoughts and emotions. Therefore, many studies administering cognitive assessments will include some form of memory and executive function and memory assessment(5,6). Some studies indicate that ACEs have negative effects on cognitive functioning later in life(7–10). These studies examining the specific types of ACEs have reported associations of the death of a parent, parental excess alcohol and drug use, mental health problems, physical neglect, and emotional abuse experienced during childhood with worse memory later in life. Moreover, two systematic reviews found that abuse and neglect were associated with worse executive function(11,12). Additionally, greater numbers of ACEs are associated with increased risk of developing ADRD(13–15). Despite findings of ACEs being associated with poorer memory and higher risk of ADRD, other studies have shown mixed results, with weak to no association of ACEs with change in cognition over time(16,17). Furthermore, the literature is mixed on the specific impact that ACEs have on late-life cognitive

1  
2  
3 functioning with some ACEs being associated with slower cognitive decline in older Black  
4  
5 adults but no decline in older White adults(18,19).  
6  
7

8 Two interrelated life course theories serve as a framework for understanding how early  
9  
10 life exposures, such as ACEs, may affect later life cognitive outcomes. The Cumulative  
11  
12 Advantage/Disadvantage theory posits that structural and institutional processes contribute to  
13  
14 differential access to resources or harmful exposures that accumulate in a non-additive way over  
15  
16 time(20,21). Individuals who are exposed to more ACEs over time will have an increased risk of  
17  
18 negative health outcomes, including poor cognition, later in life. Building on this theory, the  
19  
20 Cumulative Inequality (CI) theory incorporates life course factors that take into consideration the  
21  
22 intergenerational, socioeconomic, and stress processes important in the environment in which a  
23  
24 child grows up(22,23). Both theories recognize that the trajectories established by negative  
25  
26 childhood exposures can be altered by positive experiences throughout the life course. ACEs  
27  
28 may be a predictor of worse outcomes in later life, but positive experiences such as social  
29  
30 support and individual response to adversity may minimize the negative effects on cognitive  
31  
32 outcomes. Due to the relationships between both theories, we will consider them together as the  
33  
34 CI theory.  
35  
36  
37  
38  
39

40 Compared to White Americans, Black Americans have a higher risk of ADRD and report  
41  
42 more ACEs(24–26). However, the relationship between childhood adversity and cognition in  
43  
44 later life among Black adults remains ambiguous(27–29). The two studies that have examined  
45  
46 ACEs and cognitive outcomes in Black adults have had mixed results(16,18). One study  
47  
48 examining 427 older Blacks adults found no associations between ACEs and cognition(16).  
49  
50 Another study among 3700 older Black adults found that those who reported experiencing food  
51  
52  
53  
54  
55  
56  
57  
58  
59  
60

1  
2  
3 deprivation and having thinner body size than their peers in early life had slower rates of  
4  
5 cognitive decline compared to those who did not report food deprivation or being thinner(18).  
6

7  
8 The aim of this paper was to examine the association between total number of ACEs as  
9  
10 well as the specific ACEs experienced with cognitive change in a cohort of middle-aged and  
11  
12 older Black adults. To expand the sparse existing literature, we focus on Black individuals and  
13  
14 their early-life experiences(3). Based on the CI theory, we hypothesize a dose-response  
15  
16 relationship where each additional ACE experienced is associated with faster cognitive decline,  
17  
18 and all types of ACEs predict worse cognitive outcomes.  
19  
20

## 21 **METHODS**

### 22 **Study participants and data collection**

23  
24  
25  
26 The STAR cohort consists of community-dwelling midlife to older Black adults that  
27  
28 reside in the San Francisco Bay area of California, primarily the cities of Oakland and  
29  
30 Richmond(30,31). STAR aims to evaluate how lifecourse vascular and sociocultural factors  
31  
32 influence the trajectory of cognitive aging and burden of cognitive impairment among Black  
33  
34 Americans. Individuals eligible for STAR were long-term members of Kaiser Permanente  
35  
36 Northern California, an integrated healthcare delivery system, who identified as Black or African  
37  
38 American, were age 50 years or older on January 1, 2018, and had previously participated in  
39  
40 Kaiser Permanente multiphasic health checkup (MHC) exams between 1964-1985. Stratified  
41  
42 random sampling by age and educational attainment was used with the goal of recruiting  
43  
44 approximately equal proportions of participants ages 50-64 and 65 and older. Exclusion criteria  
45  
46 included electronic medical record diagnosis of dementia or other neurodegenerative diseases  
47  
48 (frontotemporal dementia, Lewy body disease, Pick's disease, Parkinson's disease with  
49  
50 dementia, Huntington's disease) and presence of health conditions that would impede  
51  
52  
53  
54  
55  
56  
57  
58  
59  
60

1  
2  
3 participation in study interviews (defined by hospice activity in the past 12 months, history of  
4  
5 severe chronic obstructive pulmonary disease in the past 6 months, congestive heart failure  
6  
7 hospitalizations in the past 6 months, and history of end stage renal disease or dialysis in the past  
8  
9 12 months). Although most participants of STAR resided in California by the 1960s, more than  
10  
11 half of the participants (53%) were born outside of California, and about one-third (36%) of  
12  
13 these participants were from the Southern states.  
14  
15

### 16 **Patients and Public Involvement**

17  
18  
19 No patients nor the public were involved in the design, conduct, reporting, or  
20  
21 dissemination plans of our research.  
22

### 23 **Measures**

#### 24 **Cognition**

25  
26  
27  
28 Cognitive function was assessed at each STAR wave using the Spanish and English  
29  
30 Neuropsychological Assessment Scales (SENAS), a battery of cognitive tests that have  
31  
32 undergone extensive development using item response theory methodology for valid  
33  
34 comparisons of cognition and cognitive change across racial/ethnic and linguistically diverse  
35  
36 groups(32–34). Cognitive domains of executive function and verbal episodic memory were  
37  
38 derived from the SENAS. Executive function is a composite constructed from components of  
39  
40 category fluency, phonemic/letter fluency, and working memory (digit span backward, and two  
41  
42 list sorting). Verbal episodic memory was derived from two Word List Learning tests. Each  
43  
44 domain was z-standardized using to the full baseline sample. Moreover, neither cognitive  
45  
46 domains is limited by any ceiling or floor effect(32). Details of the administration procedures,  
47  
48 development, and psychometric characteristics can be found described in-depth elsewhere(32–  
49  
50  
51  
52  
53  
54  
55  
56  
57  
58  
59  
60

1  
2  
3 35). Cognitive trajectories were measured across three waves of data approximately 14 months  
4  
5 apart totally over 3 years.

#### 6 7 Adverse childhood experiences (ACEs)

8  
9  
10 STAR fielded a modified version of the ACEs assessment from the REason for  
11  
12 Geographic and Racial Disparities in Stroke (REGARDS) cohort(36–38). During baseline  
13  
14 interviews, participants were asked verbally if they experienced nine separate types of ACEs  
15  
16 during childhood from birth to age 16. ACEs included experiences of parents' divorce or  
17  
18 separation, a parent remarrying, witnessing domestic violence, substance abuse by a family  
19  
20 member, loss of a job by a parent, a parent going to jail, serious illness of a family member,  
21  
22 death of mother, and death of father. ACEs were examined individually and as a composite ACE  
23  
24 score defined as the sum of ACEs reported and recategorized as 0, 1, 2, 3, or 4 or more ACEs.  
25  
26 Summation of ACEs models the cumulative effect that is reflective of the CI theory and  
27  
28 cumulative ACEs score from 0 to 4 or more is one of the most commonly used methods for  
29  
30 operationalizing ACEs. Cumulative ACEs score has been found to have a dose-response  
31  
32 association with various health outcomes(2,39–41). Approximately 2% of participants (n = 14)  
33  
34 had missing ACEs and were excluded from the analyses.  
35  
36  
37  
38

#### 39 40 Covariates

41  
42 As ACEs occurs early in life, we identified potential factors in early life that may cause  
43  
44 confounding in the association of ACEs and late-life cognition and cognitive decline(7,10,16–  
45  
46 18). We adjusted for five early-life social support factors that may confound the associations of  
47  
48 ACEs and later-life cognition. Using a five level Likert-type scale (1 = None of the time, 2 = A  
49  
50 little of the time, 3 = Some of the time, 4 = Most of the time, and 5 = All of the time),  
51  
52 participants were asked: “How often was there someone in whom you could talk to, trust and  
53  
54  
55  
56  
57  
58  
59  
60

1  
2  
3 confide?,” “How often was there someone who showed you love and affection?,” “How often  
4 was there someone who could help you with your homework?,” “How often was there someone  
5 who encouraged and pushed you to succeed in school?,” and “How often did you have as much  
6 contact as you would like with someone you felt close to, someone in whom you could trust and  
7 confide?” The responses were dichotomized with cutoffs between high frequency (most and all  
8 of the time) and low frequency (none, a little, and some of the time). A composite score was  
9 created for early life factor by summation of the five scores (ranges 0-20) with higher score  
10 indicating higher levels of social support.  
11  
12  
13  
14  
15  
16  
17  
18  
19  
20

21 We additionally adjusted for early life socioeconomic status (SES) by including  
22 combined parental education (both parents with less than high school vs at least one parent with  
23 high school graduation or more), self-reported childhood family housing status (mortgage or  
24 owned home vs rental or others), and how often the participant reported going hungry as a child  
25 (never vs ever). Parental education was reported by the participants as highest level of education  
26 completed for both maternal and paternal parent. Both parent’s education was combined into one  
27 parental education and dichotomized as both parents with less than high school diploma, and  
28 either one or both parents with more than high school diploma. Due to the small number of either  
29 one or both parents obtaining higher than high school diploma (38%), we operationalize parent  
30 education at the high school level cutoff. If both maternal and paternal education was missing,  
31 parental education was classified as less than a high school diploma, and these participants were  
32 demarcated by including a missing indicator covariate in all models.  
33  
34  
35  
36  
37  
38  
39  
40  
41  
42  
43  
44  
45  
46  
47  
48

49 Other covariates included age at baseline interview centered at the mean baseline age, sex  
50 (men or women) which was derived from self-report or participant medical records and likely  
51 reflected a mixture of sex assigned at birth and gender identity, and self-reported educational  
52  
53  
54  
55  
56  
57  
58  
59  
60



1  
2  
3 attainment (collapsed as less than college degree, some college, and college graduate or more)  
4  
5 captured during STAR baseline interviews.  
6

### 7 8 **Statistical analysis** 9

10 The distribution of demographics, childhood social support, childhood SES indicators,  
11 and type of ACEs were estimated overall and stratified by the number of ACEs experienced.  
12  
13 Two sets of linear mixed models were used to assess the association of cognition with: 1)  
14 composite ACE score and 2) individual ACEs, allowing for random intercept and slope to  
15 account for within-person correlation. The models were adjusted for time (as years since  
16 baseline) to estimate trajectories across three waves. We sequentially adjusted for covariates in  
17 our composite ACEs models by 1) adjusting for baseline mean-centered age and sex, 2) adjusted  
18 for childhood SES indicators, and 3) adjusted for childhood support. For models with individual  
19 ACEs, we sequentially adjusted for covariates by 1) adjusting for baseline mean-centered age, 2)  
20 sex, and 3) parental education. Interaction terms for time scale with exposure and covariates  
21 were added to each model to measure changes in cognition over time.  
22  
23  
24  
25  
26  
27  
28  
29  
30  
31  
32  
33  
34

35 From a cohort of 764 participants, we excluded 14 participants for missing information  
36 on ACEs, 15 participants for missing early life social support and SES covariates, and 16  
37 participants for missing report of sex.  
38  
39  
40  
41

### 42 **RESULTS** 43

44 Our analytic sample consisted of 707 participants with a mean age of 68.6 (SD 8.7) years  
45 (range, 53-95 years) of whom 487 (68.9%) were women compared to 220 (31.1%) men (Table  
46  
47 1). About 21% of participants reported no ACE, 23.6% reported one ACE, 20% reported two  
48 ACEs, 17.3% reported three ACEs, and 16.8% reported four or more ACEs. Seventy-nine  
49 percent of participants had at least one ACE. The most common ACE reported was experiencing  
50  
51  
52  
53  
54  
55  
56  
57  
58  
59  
60

1  
2  
3 parents' separation or divorce (38.5%), followed by serious family illness (35.4%), and  
4  
5 witnessing domestic violence (31.5%). More than a third (35.5%) of participants had a college  
6  
7 degree or higher, and 38% of participants had one or both parents with more than a high school-  
8  
9 level education (Table 1). Participants in this cohort generally had high levels of support  
10  
11 (average composite score of 15.8 and SD = 4.7) during childhood with majority of participants  
12  
13 reporting someone they could trust (76%), someone to love them (86%), someone to help with  
14  
15 homework (66%), someone to motivate or encourage them in school (79%), and someone close  
16  
17 to them they could contact (77%) all or most of the time. Most participants self-reported as being  
18  
19 well-off or above average financially during childhood (68%), and most participants never  
20  
21 experienced childhood hunger (92%). About 83% of our baseline cohort had two waves of  
22  
23 cognitive measures, and over 75% of participants had all three waves of cognitive measures.  
24  
25  
26  
27

### 28 **Composite number of ACEs**

29  
30  
31 In our linear mixed models examining associations of the composite ACEs and baseline  
32  
33 executive function (Table 2), we observed a negative non-significant associations for one ACE  
34  
35 ( $\beta = -0.130$ ; 95% CI -0.316 to 0.055), two ACEs ( $\beta = -0.039$ ; 95% CI -0.231 to 0.152) and 4+  
36  
37 ACEs ( $\beta = -0.025$ ; 95% CI -0.228 to 0.178), and a positive non-significant association for three  
38  
39 ACEs ( $\beta = 0.008$ ; 95% CI -0.193 to 0.209) compared to no ACEs. After adjusting for childhood  
40  
41 SES, the estimates decreased for one ACE ( $\beta = -0.090$ ; 95% CI -0.272 to 0.093), increased for  
42  
43 three ACEs ( $\beta = 0.070$ ; 95% CI -0.132 to 0.271), and changed direction for two ACEs ( $\beta =$   
44  
45  $0.008$ ; 95% CI -0.181 to 0.197) and 4+ ACEs ( $\beta = 0.052$ ; 95% CI -0.155 to 0.259) suggesting a  
46  
47 non-significant positive association with baseline executive function. The estimates were  
48  
49 attenuated after further adjusting for childhood support. We observed a non-significant negative  
50  
51 association between composite ACEs and baseline verbal episodic memory for one ACE ( $\beta = -$   
52  
53  
54  
55  
56  
57  
58  
59  
60

1  
2  
3 0.137; 95% CI -0.321 to 0.048), two ACEs ( $\beta = -0.041$ ; 95% CI -0.231 to 0.149) and three ACEs  
4  
5 ( $\beta = -0.120$ ; 95% CI -0.320 to 0.080), but positive association for 4+ ACEs ( $\beta = 0.105$ ; 95% CI -  
6  
7 0.097 to 0.307). After adjusting for childhood SES and childhood support, point estimates for the  
8  
9 association between ACEs and baseline verbal episodic memory were attenuated.  
10  
11

12 When examined longitudinally, there was significantly slower decline in executive  
13  
14 function among those who reported experiencing two ACEs ( $\beta=0.117$ ; 95% CI 0.052 to 0.182),  
15  
16 three ACEs ( $\beta=0.075$ ; 95% CI 0.007 to 0.153), and four or more ACEs ( $\beta=0.089$ ; 95% CI 0.002  
17  
18 to 0.158), but not for one ACE ( $\beta=0.053$ ; 95% CI -0.010 to 0.116) compared to no ACEs (Table  
19  
20 2, Figure 1). The estimates and direction of associations remained consistent after adjusting for  
21  
22 childhood SES and childhood social support variables (Table 2).  
23  
24  
25

26 There were no significant associations between the composite ACEs score and verbal  
27  
28 episodic memory over time (Supplemental Figure 1). However, the point estimates were negative  
29  
30 for one ACE ( $\beta=-0.017$ ; 95% CI -0.108 to 0.075) and 4+ ACEs ( $\beta=-0.022$ ; 95% CI -0.123 to  
31  
32 0.078), and point estimates were positive for two ACEs ( $\beta=0.074$ ; 95% CI -0.021 to 0.159) and  
33  
34 three ACEs ( $\beta=0.050$ ; 95% CI -0.048 to 0.148) compared to no ACEs (Table 2). The  
35  
36 longitudinal point estimates changed minimally after adjusting for childhood SES and childhood  
37  
38 social support.  
39  
40  
41

### 42 **Individual ACEs**

43  
44 When evaluating linear mixed models for executive function and verbal episodic memory  
45  
46 with individual ACEs as predictors, there were no significant associations with baseline  
47  
48 cognition or change of cognition over time (Supplemental Table 1). All individual ACEs had  
49  
50 non-significant positive associations for executive function, except for death of mother which  
51  
52 had non-significant negative association. Longitudinal estimates for verbal episodic memory  
53  
54  
55  
56  
57  
58  
59  
60

1  
2  
3 were mixed with non-significant positive associations for parent separated, parent remarried,  
4 serious family illness, death of mother, and death of father, while non-significant negative  
5 associations were observed for witnessed violence, substance abuse, loss of job, and parent jail.  
6  
7  
8  
9  
10

## 11 **DISCUSSION**

12  
13  
14 In our cohort, ACEs was not significantly associated with baseline executive function or  
15 verbal episodic memory. We found that those who experienced multiple ACEs had slower  
16 decline in executive function than those who did not experience any ACEs, but we did not see  
17 this for verbal episodic memory. Our findings did not align with our hypothesis that exposure to  
18 ACEs would be associated with lower baseline cognition and greater cognitive decline. These  
19 results are consistent with some prior work in which similar results were observed in the Chicago  
20 Health and Aging Project (CHAP) cohort study of over 3700 older Black adults (average age 78  
21 years) where those that experienced food deprivation had slower cognitive decline later in  
22 life(18). Our study included a younger cohort of Black Americans (average age 68 years)  
23 compared to CHAP(18) on childhood adversity and cognition. In another cross sectional study,  
24 no associations were found between composite and individual ACEs across different ages of  
25 childhood with baseline cognition within Black older adults when stratified by race(16). There is  
26 limited work on early life adversity and late-life cognition in Black Americans, and findings in  
27 our study, using an all-Black cohort, show similar results to previous work in this area.  
28  
29  
30  
31  
32  
33  
34  
35  
36  
37  
38  
39  
40  
41  
42  
43  
44  
45  
46

47 Our estimates of the association between individual ACEs and domain-specific baseline  
48 cognition and cognitive decline were not statistically significant. The association between  
49 composite ACEs and verbal episodic memory were also not statistically significant. However,  
50 point estimates and borderline confidence intervals in our study suggests that composite ACEs  
51  
52  
53  
54  
55  
56  
57  
58  
59  
60

1  
2  
3 (two and three ACEs) may be associated with slower verbal episodic memory decline. These  
4 findings are consistent with other studies finding that individual household-related ACEs were  
5 not associated with cognition(7,9,10,16–19).  
6  
7  
8  
9

10 ACEs were highly prevalent in our cohort with close to 80% experiencing one or more  
11 ACEs. We observed that experiencing ACEs was associated with slower decline in executive  
12 function, but not verbal episodic memory, indicating possible domain-specificity. A review  
13 found that ACEs (emotional and sexual abuse) were associated with better executive  
14 function(12), while other studies found that ACEs were associated with worse memory and not  
15 executive function(7,8,10). One study examining a Chinese cohort found that experiencing at  
16 least two ACEs and three types of ACEs (childhood SES disadvantage, parental trauma,  
17 maladaptive parental trauma) were associated with decreased episodic memory(42,43), which  
18 was supported by another study that found depressive symptoms during early life to be  
19 associated with episodic memory deficit(44). A meta-analysis found that the associations  
20 between ACEs and cognition varied by individual ACEs and type of cognitive outcome(19). For  
21 example, some studies reported association of ACEs with lower cognitive scores and higher risk  
22 of neurocognitive disorder (NCD) diagnosis, while other studies found association of physical or  
23 sexual abuse with better cognition, parental death with lower risk of NCD, and collective  
24 violence with better global cognition(19). Our analysis did not find significant associations of  
25 individual ACEs with cognitive decline in any domain.  
26  
27  
28  
29  
30  
31  
32  
33  
34  
35  
36  
37  
38  
39  
40  
41  
42  
43  
44  
45

46 Although ACEs could influence a child's development into adulthood through increased  
47 toxic stress pathways, these experiences may only partially contribute to cognitive functioning in  
48 late life(3,45). Beyond cognition, other studies found that ACEs are associated with higher risk  
49 of cardiovascular disease, shortened telomeres, and greater functional limitations in Black  
50  
51  
52  
53  
54  
55  
56  
57  
58  
59  
60

1  
2  
3 adults(46–48). Environmental, social, and behavioral factors throughout a person’s life stand to  
4 mediate and even protect against the negative long-term effects of ACEs(9,28). In one study(9),  
5 positive childhood environment was found to promote executive functioning. Educational  
6 attainment could also be protective for later-life cognitive function through cognitive  
7 reserve(10,29). Our cohort was highly educated and reported a high prevalence of childhood  
8 support which could explain why ACEs were not associated with lower baseline cognition.  
9

10  
11 The Cumulative Inequity (CI) theory provides as a meaningful framework for explaining  
12 the observed relationships in our study. One possibility for our findings is that it reflects a pattern  
13 of resiliency. Among those who experienced ACEs, many had parents who were separated or  
14 divorced (39%), had family members with serious illness (35%), or witnessed domestic violence  
15 (32%). CI theory suggests that the detrimental, cumulative impact of experiencing multiple  
16 ACEs may have been modified by other factors, such as human agency or social support(23).  
17 Most participants reported receiving support during childhood most or all of the time with 76%  
18 reported having someone they trust or confide in, 86% having someone show them love, 66%  
19 having someone help with homework, 79% having someone to motivate them in school, and  
20 77% having someone close to them that they can contact. In a literature review of Black  
21 Americans, multiple studies found that lower SES was associated with faster cellular markers of  
22 biological aging and earlier development of memory problems(3). The STAR cohort, on average,  
23 has higher SES which may mitigate the impact of ACEs on cognition. Another explanation for  
24 our findings is resiliency through selection and survival bias of only the healthiest individuals  
25 that chose to participate in the study. Black participants in STAR may be exceptional in that they  
26 overcame the negative effects of early childhood adversity, survived long enough, and were  
27 healthy enough to enroll in a study on cognitive aging. It is also important to consider that STAR  
28  
29  
30  
31  
32  
33  
34  
35  
36  
37  
38  
39  
40  
41  
42  
43  
44  
45  
46  
47  
48  
49  
50  
51  
52  
53  
54  
55  
56  
57  
58  
59  
60

1  
2  
3 consists of older Black individuals who's early life corresponded with de jure and de facto  
4 policies that upheld and endorsed racism in education, access to healthcare, socioeconomic  
5 status, and discrimination, which may further affirm that only the most resilient individuals had  
6 the opportunity to live into old age(49).  
7  
8  
9  
10  
11

12 Our study had several strengths. First, we utilized data from a well-characterized cohort  
13 of mid- to late-life Black participants. By evaluating ACEs in an all-Black cohort, we were able  
14 to identify early life experiences within this understudied group and assess relationships between  
15 ACEs and late-life cognition using a within-group analysis, an approach that is not typically used  
16 in studies of minoritized older adults(3,50). Second, we examined cognition using a robust  
17 psychometric battery that has specifically been validated for use in Black Americans(32–35). By  
18 following our cohort over three waves (average 2.3 years of follow-up), we were able to examine  
19 changes in cognition over time. Lastly, our ACEs questionnaire was adapted from a robust  
20 measure used in other cohort studies with diverse participants(16,37,38).  
21  
22  
23  
24  
25  
26  
27  
28  
29  
30  
31  
32

33 There were several limitations in our study. First, since ACEs occurred early in life,  
34 recall bias could influence responses. Older participants were asked to remember potentially  
35 traumatic events during childhood, which could lead to under- or overestimation of the  
36 prevalence of ACEs(41,51). Social desirability bias may also prevent participants from  
37 disclosing sensitive and revealing information about their early life(52). Experiences of abuse or  
38 neglect were not captured by the ACEs questionnaire, but may reflect other dimensions of  
39 childhood adversity with different effects on late-life cognition(53). As a middle-age and older  
40 cohort with a relatively shorter follow-up time of approximately 3 years, there could be practice  
41 effects impacting cognitive testing. Yet, when we adjusted for practice effects using a first visit  
42 indicator in the models, we found estimates to be almost identical(54). Given this short follow-  
43  
44  
45  
46  
47  
48  
49  
50  
51  
52  
53  
54  
55  
56  
57  
58  
59  
60

1  
2  
3 up, it is also possible that participants did not experience substantial decline, and this study  
4 cannot examine how ACEs impact long-term cognitive decline yet, but this is a future goal.  
5  
6

7  
8 Our findings suggest that experiencing ACEs was not associated with worse cognition or  
9  
10 cognitive decline in this cohort of older Black Americans. Additionally, the accumulation of  
11  
12 ACEs may be associated with slower decline in executive function, a finding that needs to be  
13  
14 explored further. CI theory posits that early life adversities do not fully determine cognitive  
15  
16 trajectories in older adults and resiliency may subsequently develop through midlife and later  
17  
18 life. Future studies are needed to understand how resiliency factors such as childhood support,  
19  
20 education, and financial stability can be protective against ACEs as well as cognitive decline,  
21  
22 especially among marginalized and high-risk communities. Specifically, mediation and  
23  
24 moderation analyses of these protective factors will be needed to determine their effects on  
25  
26 ACEs with late-life cognition and explain potential resiliency observed in Black Americans.  
27  
28  
29  
30  
31  
32  
33  
34  
35  
36  
37  
38  
39  
40  
41  
42  
43  
44  
45  
46  
47  
48  
49  
50  
51  
52  
53  
54  
55  
56  
57  
58  
59  
60



**BMJ Open**

**The original protocol for the study**, as a supplementary file.

**Funding:** This work was supported by National Institutes of Health grant number RF1 AG050782

**Competing Interests:** None declared

**Author Contributions:** YL, KMG, RLP, and RAW were involved with study design, data acquisition, data analysis, interpreting the results and drafting the work. PG, CCM, EHL, LLB, and DMM were involved in critically reviewing the contents. All authors revised, approved final version of the manuscript, and agree to accept responsibility of all aspects of the work.

**Patient Consent for Publications:** Not required

**Word count:** 3980 (Limit: 4000)

**Ethics Approval:** The Study of Healthy Aging in African Americans (STAR) was approved by Kaiser Permanente Northern California Institutional Review Board (IRB Number: 1121043)

**Data availability statement:** Data are available upon reasonable request. Data may be obtained from a third party and are not publicly available. Deidentified data are available to qualified investigators from the STAR Leadership Committee on approval for the purposes of replicating procedures and results.

## Bibliography

1. Felitti VJ. Adverse childhood experiences and adult health. *Acad Pediatr*. 2009 Jun;9(3):131–2.
2. Felitti VJ, Anda RF, Nordenberg D, Williamson DF, Spitz AM, Edwards V, et al. Relationship of Childhood Abuse and Household Dysfunction to Many of the Leading Causes of Death in Adults. *Am J Prev Med*. 1998 May;14(4):245–58.
3. Graham KL, Paun O, Stillerman A. The Impact of Adverse Childhood Experiences on Cognition in African American Older Adults: An Integrated Literature Review. *Res Gerontol Nurs*. 2021 Oct;14(5):265–72.
4. 2021 Alzheimer’s Disease Facts and Figures [Internet]. Alzheimer’s Association; 2021 [cited 2021 Jun 5]. Available from: <https://www.alz.org/media/documents/alzheimers-facts-and-figures.pdf>
5. Cordell CB, Borson S, Boustani M, Chodosh J, Reuben D, Verghese J, et al. Alzheimer’s Association recommendations for operationalizing the detection of cognitive impairment during the Medicare Annual Wellness Visit in a primary care setting. *Alzheimers Dement*. 2013 Mar;9(2):141–50.
6. Sheehan B. Assessment scales in dementia. *Ther Adv Neurol Disord*. 2012 Nov;5(6):349–58.
7. Kobayashi LC, Farrell MT, Payne CF, Mall S, Montana L, Wagner RG, et al. Adverse childhood experiences and domain-specific cognitive function in a population-based study of older adults in rural South Africa. *Psychol Aging*. 2020 Sep;35(6):818–30.
8. Majer M, Nater UM, Lin JMS, Capuron L, Reeves WC. Association of childhood trauma with cognitive function in healthy adults: a pilot study. *BMC Neurol*. 2010 Jul 14;10:61.
9. Ritchie K, Jaussent I, Stewart R, Dupuy AM, Courtet P, Malafosse A, et al. Adverse childhood environment and late-life cognitive functioning. *Int J Geriatr Psychiatry*. 2011 May;26(5):503–10.
10. Yang L, Wang Z. Early-Life Conditions and Cognitive Function in Middle-and Old-Aged Chinese Adults: A Longitudinal Study. *Int J Environ Res Public Health*. 2020 May 15;17(10).
11. Lund JI, Toombs E, Radford A, Boles K, Mushquash C. Adverse Childhood Experiences and Executive Function Difficulties in Children: A Systematic Review. *Child Abuse Negl*. 2020 Aug;106:104485.
12. Lund JI, Boles K, Radford A, Toombs E, Mushquash CJ. A Systematic Review of Childhood Adversity and Executive Functions Outcomes among Adults. *Arch Clin Neuropsychol Off J Natl Acad Neuropsychol*. 2022 Aug 23;37(6):1118–32.

13. Donley GAR, Lönnroos E, Tuomainen TP, Kauhanen J. Association of childhood stress with late-life dementia and Alzheimer's disease: the KIHJ study. *Eur J Public Health*. 2018 Dec 1;28(6):1069–73.
14. Radford K, Delbaere K, Draper B, Mack HA, Daylight G, Cumming R, et al. Childhood Stress and Adversity is Associated with Late-Life Dementia in Aboriginal Australians. *Am J Geriatr Psychiatry Off J Am Assoc Geriatr Psychiatry*. 2017 Oct;25(10):1097–106.
15. Tani Y, Fujiwara T, Kondo K. Association Between Adverse Childhood Experiences and Dementia in Older Japanese Adults. *JAMA Netw Open*. 2020 Feb 5;3(2):e1920740.
16. Gold AL, Meza E, Ackley SF, Mungas DM, Whitmer RA, Mayeda ER, et al. Are adverse childhood experiences associated with late-life cognitive performance across racial/ethnic groups: results from the Kaiser Healthy Aging and Diverse Life Experiences study baseline. *BMJ Open*. 2021 Feb 5;11(2):e042125.
17. O'Shea BQ, Demakakos P, Cadar D, Kobayashi LC. Adverse Childhood Experiences and Rate of Memory Decline From Mid to Later Life: Evidence From the English Longitudinal Study of Ageing. *Am J Epidemiol*. 2021 Jul 1;190(7):1294–305.
18. Barnes LL, Wilson RS, Everson-Rose SA, Hayward MD, Evans DA, Mendes de Leon CF. Effects of early-life adversity on cognitive decline in older African Americans and whites. *Neurology*. 2012 Dec 11;79(24):2321–7.
19. Patel P, Oremus M. The association between adverse childhood experiences and late-life cognition: A systematic review of cross-sectional and case-control studies. *The Gerontologist*. 2022 Mar 22;gnac041.
20. Dannefer D. Cumulative Advantage/Disadvantage and the Life Course: Cross-Fertilizing Age and Social Science Theory. *J Gerontol Ser B*. 2003 Nov 1;58(6):S327–37.
21. Yang MS, Hedeker D. A life-span approach to examining older vulnerable population's subjective well-being: the role of adversity and trauma. *Aging Ment Health*. 2020 Dec 1;24(12):2043–52.
22. Ferraro KF, Schafer MH, Wilkinson LR. Childhood Disadvantage and Health Problems in Middle and Later Life: Early Imprints on Physical Health? *Am Sociol Rev*. 2016 Feb 1;81(1):107–33.
23. Ferraro KF, Shippee TP. Aging and Cumulative Inequality: How Does Inequality Get Under the Skin? *The Gerontologist*. 2009 Jun;49(3):333–43.
24. Giano Z, Wheeler DL, Hubach RD. The frequencies and disparities of adverse childhood experiences in the U.S. *BMC Public Health [Internet]*. 2020 Sep 10 [cited 2021 Jan 29];20. Available from: <https://www.ncbi.nlm.nih.gov/pmc/articles/PMC7488299/>
25. Maguire-Jack K, Lanier P, Lombardi B. Investigating racial differences in clusters of adverse childhood experiences. *Am J Orthopsychiatry*. 2020;90(1):106–14.

- 1
  - 2
  - 3
  - 4
  - 5
  - 6
  - 7
  - 8
  - 9
  - 10
  - 11
  - 12
  - 13
  - 14
  - 15
  - 16
  - 17
  - 18
  - 19
  - 20
  - 21
  - 22
  - 23
  - 24
  - 25
  - 26
  - 27
  - 28
  - 29
  - 30
  - 31
  - 32
  - 33
  - 34
  - 35
  - 36
  - 37
  - 38
  - 39
  - 40
  - 41
  - 42
  - 43
  - 44
  - 45
  - 46
  - 47
  - 48
  - 49
  - 50
  - 51
  - 52
  - 53
  - 54
  - 55
  - 56
  - 57
  - 58
  - 59
  - 60
26. Merrick MT, Ford DC, Ports KA, Guinn AS. Prevalence of Adverse Childhood Experiences From the 2011-2014 Behavioral Risk Factor Surveillance System in 23 States. *JAMA Pediatr.* 2018 Nov;172(11):1038–44.
27. Mayeda ER, Glymour MM, Quesenberry CP, Whitmer RA. Inequalities in dementia incidence between six racial and ethnic groups over 14 years. *Alzheimers Dement J Alzheimers Assoc.* 2016 Mar;12(3):216–24.
28. Peterson RL, Fain MJ, Butler EA, Ehiri JE, Carvajal SC. The role of social and behavioral risk factors in explaining racial disparities in age-related cognitive impairment: a structured narrative review. *Aging Neuropsychol Cogn.* 2020 Mar 3;27(2):173–96.
29. Weuve J, Barnes LL, Mendes de Leon CF, Rajan KB, Beck T, Aggarwal NT, et al. Cognitive Aging in Black and White Americans: Cognition, Cognitive Decline, and Incidence of Alzheimer Disease Dementia. *Epidemiol Camb Mass.* 2018 Jan;29(1):151–9.
30. George KM, Gilsanz P, Peterson RL, Barnes LL, DeCarli CS, Mayeda ER, et al. Impact of Cardiovascular Risk Factors in Adolescence, Young Adulthood, and Midlife on Late-Life Cognition: Study of Healthy Aging in African Americans. *J Gerontol Ser A.* 2021 Sep 1;76(9):1692–8.
31. Whitmer RA, Barnes LL, Richards AE, Miles S, Mayeda ER, Glymour MM, et al. Introducing the Study of Healthy Aging in African Americans (STAR): Looking back to move forward. *Alzheimers Dement.* 2020;16(S10):e046614.
32. Mungas D, Reed BR, Crane PK, Haan MN, González H. Spanish and English Neuropsychological Assessment Scales (SENAS): further development and psychometric characteristics. *Psychol Assess.* 2004 Dec;16(4):347–59.
33. Mungas DM, Reed BR, Haan MN, Gonzalez H. Spanish and English Neuropsychological Assessment Scales: Relationship to demographics, language, cognition, and independent function. *Neuropsychology.* 2005 Jul;19(4):466–75.
34. Mungas D, Reed BR, Marshall SC, González HM. Development of psychometrically matched English and Spanish language neuropsychological tests for older persons. *Neuropsychology.* 2000 Apr;14(2):209–23.
35. Mungas D, Widaman KF, Reed BR, Farias ST. Measurement Invariance of Neuropsychological Tests in Diverse Older Persons. *Neuropsychology.* 2011 Mar;25(2):260–9.
36. Howard VJ, McClure LA, Glymour MM, Cunningham SA, Kleindorfer DO, Crowe M, et al. Effect of duration and age at exposure to the Stroke Belt on incident stroke in adulthood. *Neurology.* 2013 Apr 30;80(18):1655–61.
37. Yen IH, Bennett A, Allen S, Vable A, Long DL, Brooks M, et al. Childhood Residential Mobility and Mental and Physical Health in Later Life: Findings From the Reasons for

- 1  
2  
3 Geographic and Racial Differences in Stroke (REGARDS) Study. *J Appl Gerontol Off J*  
4 *South Gerontol Soc.* 2023 Aug;42(8):1859–66.  
5  
6  
7 38. Howard VJ, Cushman M, Pulley L, Gomez CR, Go RC, Prineas RJ, et al. The reasons for  
8 geographic and racial differences in stroke study: objectives and design. *Neuroepidemiology.*  
9 2005;25(3):135–43.  
10  
11 39. Anda RF, Felitti VJ, Bremner JD, Walker JD, Whitfield C, Perry BD, et al. The enduring  
12 effects of abuse and related adverse experiences in childhood. *Eur Arch Psychiatry Clin*  
13 *Neurosci.* 2006 Apr;256(3):174–86.  
14  
15 40. Campbell TL. Screening for Adverse Childhood Experiences (ACEs) in Primary Care: A  
16 Cautionary Note. *JAMA.* 2020 Jun 16;323(23):2379–80.  
17  
18 41. Lacey RE, Minnis H. Practitioner Review: Twenty years of research with adverse childhood  
19 experience scores – Advantages, disadvantages and applications to practice. *J Child Psychol*  
20 *Psychiatry.* 2020;61(2):116–30.  
21  
22 42. Lin L, Cao B, Chen W, Li J, Zhang Y, Guo VY. Association of Adverse Childhood  
23 Experiences and Social Isolation With Later-Life Cognitive Function Among Adults in  
24 China. *JAMA Netw Open.* 2022 Nov 11;5(11):e2241714.  
25  
26 43. Ding R, He P. Associations between childhood adversities and late-life cognitive function:  
27 Potential mechanisms. *Soc Sci Med.* 2021 Dec 1;291:114478.  
28  
29 44. Barch DM, Harms MP, Tillman R, Hawkey E, Luby JL. Early childhood depression,  
30 emotion regulation, episodic memory, and hippocampal development. *J Abnorm Psychol.*  
31 2019 Jan;128(1):81–95.  
32  
33 45. Morsy L, Rothstein R. Toxic stress and children’s outcomes. *Econ Policy Inst [Internet].*  
34 2019 May 1; Available from: [https://www.epi.org/publication/toxic-stress-and-childrens-](https://www.epi.org/publication/toxic-stress-and-childrens-outcomes-african-american-children-growing-up-poor-are-at-greater-risk-of-disrupted-physiological-functioning-and-depressed-academic-achievement/)  
35 [outcomes-african-american-children-growing-up-poor-are-at-greater-risk-of-disrupted-](https://www.epi.org/publication/toxic-stress-and-childrens-outcomes-african-american-children-growing-up-poor-are-at-greater-risk-of-disrupted-physiological-functioning-and-depressed-academic-achievement/)  
36 [physiological-functioning-and-depressed-academic-achievement/](https://www.epi.org/publication/toxic-stress-and-childrens-outcomes-african-american-children-growing-up-poor-are-at-greater-risk-of-disrupted-physiological-functioning-and-depressed-academic-achievement/)  
37  
38  
39  
40  
41 46. Kliewer W, Robins JL. Adverse Childhood Experiences Are Associated with  
42 Cardiometabolic Risk Indicators and Telomere Length in Low-Income African-American  
43 Adolescents. *Int J Behav Med.* 2022 Feb;29(1):131–5.  
44  
45 47. Islam SJ, Hwan Kim J, Joseph E, Topel M, Baltrus P, Liu C, et al. Association Between  
46 Early Trauma and Ideal Cardiovascular Health Among Black Americans: Results From the  
47 Morehouse-Emory Cardiovascular (MECA) Center for Health Equity. *Circ Cardiovasc Qual*  
48 *Outcomes.* 2021 Sep;14(9):e007904.  
49  
50  
51 48. Sauerteig MR, Ferraro KF, Bauldry S. Life Course Stressors and Functional Limitations in  
52 Later Life Among White, Black, and Hispanic Adults: Deleterious, Hardening, or Benign? *J*  
53 *Gerontol B Psychol Sci Soc Sci.* 2022 Jan 12;77(1):249–59.  
54  
55  
56  
57  
58  
59

- 1  
2  
3  
4  
5  
6  
7  
8  
9  
10  
11  
12  
13  
14  
15  
16  
17  
18  
19  
20  
21  
22  
23  
24  
25  
26  
27  
28  
29  
30  
31  
32  
33  
34  
35  
36  
37  
38  
39  
40  
41  
42  
43  
44  
45  
46  
47  
48  
49  
50  
51  
52  
53  
54  
55  
56  
57  
58  
59  
60
49. Glymour MM, Manly JJ. Lifecourse social conditions and racial and ethnic patterns of cognitive aging. *Neuropsychol Rev*. 2008 Sep;18(3):223–54.
  50. Whitfield KE, Altaire JC, Belue R, Edwards CL. Are Comparisons the Answer to Understanding Behavioral Aspects of Aging in Racial and Ethnic Groups? *J Gerontol B Psychol Sci Soc Sci*. 2008 Sep;63(5):P301–8.
  51. Briggs EC, Amaya-Jackson L, Putnam KT, Putnam FW. All adverse childhood experiences are not equal: The contribution of synergy to adverse childhood experience scores. *Am Psychol*. 2021 Mar;76(2):243–52.
  52. Althubaiti A. Information bias in health research: definition, pitfalls, and adjustment methods. *J Multidiscip Healthc*. 2016 May 4;9:211–7.
  53. Krinner LM, Warren-Findlow J, Bowling J, Issel LM, Reeve CL. The dimensionality of adverse childhood experiences: A scoping review of ACE dimensions measurement. *Child Abuse Negl*. 2021 Nov 1;121:105270.
  54. Chen R, Calmasini C, Swinnerton K, Wang J, Haneuse S, Ackley SF, et al. Pragmatic approaches to handling practice effects in longitudinal cognitive aging research. *Alzheimers Dement J Alzheimers Assoc*. 2023 May 18;

Table 1: Baseline characteristics stratified by number of Adverse Childhood Experiences (ACEs), STAR

| Characteristic                                        | Overall Sample                                 | 0 ACEs     | 1 ACE      | 2 ACEs     | 3 ACEs     | 4+ ACEs    |
|-------------------------------------------------------|------------------------------------------------|------------|------------|------------|------------|------------|
|                                                       | <b>N (%) or Mean (SD)</b>                      |            |            |            |            |            |
| <b>Number of Participants</b>                         | 707 (100)                                      | 151 (21.4) | 167 (23.6) | 148 (20.0) | 122 (17.3) | 119 (16.8) |
| <b>Baseline Age</b>                                   | 68.6 (8.7)                                     | 69.1 (8.2) | 69.0 (8.4) | 68.9 (9.2) | 68.8 (9.6) | 66.7 (8.2) |
| <b>Sex: Men</b>                                       | 220 (31.1)                                     | 46 (30.5)  | 56 (33.5)  | 51 (34.5)  | 38 (31.2)  | 29 (24.4)  |
| College graduate or more                              | 252 (35.6)                                     | 51 (33.8)  | 60 (35.9)  | 54 (36.5)  | 44 (36.1)  | 43 (36.1)  |
| Some college                                          | 333 (47.1)                                     | 67 (44.4)  | 83 (49.7)  | 72 (48.7)  | 56 (45.9)  | 55 (46.2)  |
| High school or less                                   | 122 (17.3)                                     | 33 (21.9)  | 24 (14.4)  | 22 (14.9)  | 22 (18.0)  | 21 (17.7)  |
| <b>Parent education: More than high school</b>        | 267 (37.8)                                     | 63 (41.7)  | 59 (35.3)  | 54 (36.5)  | 43 (35.3)  | 48 (40.3)  |
| <b>ACEs</b>                                           | <b>N (column % per variables)</b>              |            |            |            |            |            |
| Parents were separated or divorced                    | 272 (38.5)                                     | 0          | 30 (18.0)  | 63 (42.6)  | 73 (59.8)  | 106 (89.1) |
| Serious illness of a family member                    | 250 (35.4)                                     | 0          | 44 (26.4)  | 67 (45.3)  | 64 (52.5)  | 75 (63.0)  |
| Witnessed domestic violence                           | 223 (31.5)                                     | 0          | 37 (22.2)  | 41 (27.7)  | 60 (49.2)  | 85 (71.4)  |
| Substance abuse by a family member                    | 172 (24.3)                                     | 0          | 18 (10.8)  | 35 (23.7)  | 41 (33.6)  | 78 (65.6)  |
| Parent remarried                                      | 176 (24.9)                                     | 0          | 2 (1.2)    | 39 (26.4)  | 58 (47.6)  | 77 (64.7)  |
| Loss of job by a parent                               | 106 (15.0)                                     | 0          | 23 (13.8)  | 19 (12.8)  | 23 (18.9)  | 41 (34.5)  |
| Death of your father                                  | 70 (9.9)                                       | 0          | 8 (4.8)    | 18 (12.2)  | 19 (15.6)  | 25 (21.0)  |
| Parent had to go to jail                              | 53 (7.5)                                       | 0          | 2 (1.2)    | 4 (2.7)    | 10 (8.2)   | 37 (31.1)  |
| Death of your mother                                  | 42 (5.9)                                       | 0          | 3 (1.8)    | 10 (6.8)   | 18 (14.8)  | 11 (9.2)   |
| <b>Childhood Social Support</b>                       | <b>N (column % per variables) or Mean (SD)</b> |            |            |            |            |            |
| Composite childhood support (range 0 – 20)            | 15.8 (4.7)                                     | 17.1 (4.2) | 16.4 (4.3) | 15.3 (4.7) | 14.5 (4.8) | 14.9 (5.1) |
| Someone to trust and confide in most to all the times | 537 (75.7)                                     | 125 (82.8) | 136 (81.4) | 104 (70.3) | 87 (71.3)  | 83 (69.8)  |



|                                                                   |                                   |            |            |            |            |            |
|-------------------------------------------------------------------|-----------------------------------|------------|------------|------------|------------|------------|
| Someone to love most to all the times                             | 611 (86.4)                        | 143 (94.7) | 149 (89.2) | 125 (84.5) | 96 (78.7)  | 98 (82.4)  |
| Someone to help with homework most to all the times               | 466 (65.9)                        | 121 (80.1) | 118 (70.6) | 91 (61.49) | 65 (53.3)  | 71 (59.1)  |
| Someone to motivate and encourage in school most to all the times | 559 (79.1)                        | 135 (89.4) | 145 (86.8) | 107 (72.3) | 87 (71.3)  | 85 (71.4)  |
| Had contact with someone felt close to most or all the times      | 547 (77.4)                        | 126 (83.4) | 138 (82.6) | 112 (75.7) | 87 (71.3)  | 84 (70.6)  |
| <b>Childhood Socioeconomic Status</b>                             | <b>N (column % per variables)</b> |            |            |            |            |            |
| Family financially above average or well-off                      | 483 (68.3)                        | 125 (82.8) | 120 (71.9) | 101 (68.2) | 70 (57.4)  | 67 (56.3)  |
| Never hungry during childhood                                     | 650 (91.9)                        | 146 (96.7) | 157 (94.0) | 131 (88.5) | 110 (90.2) | 106 (89.1) |
| Family had a mortgage or owned a home during childhood            | 444 (62.8)                        | 118 (78.2) | 111 (66.5) | 94 (63.5)  | 65 (53.3)  | 56 (47.1)  |

ACEs: Adverse Childhood Experiences

SD: Standard Deviation

Childhood Social Support: Composite childhood support derived from individual childhood social support (range 0 = no support, 20 = most support)

Individual childhood supports are on Likert scale (1 = None of the time, 2 = A little of the time, 3 = Some of the time, 4 = Most of the time, 5 = All of the time)



Table 2: Linear mixed models estimate of the association of composite adverse childhood experiences (ACEs) with domain-specific cognition across 3 waves

|                            | Executive Function      |                        |                         | Verbal Episodic Memory  |                        |                        |
|----------------------------|-------------------------|------------------------|-------------------------|-------------------------|------------------------|------------------------|
|                            | Model 1                 | Model 2                | Model 3                 | Model 1                 | Model 2                | Model 3                |
|                            | $\beta$ (95% CI)        | $\beta$ (95% CI)       | $\beta$ (95% CI)        | $\beta$ (95% CI)        | $\beta$ (95% CI)       | $\beta$ (95% CI)       |
| <b>Years from baseline</b> | -0.071 (-0.119, -0.023) | -0.084 (-0.137, -0.03) | -0.119 (-0.222, -0.016) | -0.078 (-0.148, -0.009) | -0.108 (-0.185, -0.03) | -0.170 (-0.319, -0.02) |
|                            | <b>Baseline</b>         |                        |                         |                         |                        |                        |
| <b>ACEs</b>                |                         |                        |                         |                         |                        |                        |
| 0                          | ref                     | ref                    | ref                     | ref                     | ref                    | ref                    |
| 1                          | -0.130 (-0.316, 0.055)  | -0.090 (-0.272, 0.093) | -0.090 (-0.273, 0.092)  | -0.137 (-0.321, 0.048)  | -0.110 (-0.293, 0.073) | -0.111 (-0.294, 0.072) |
| 2                          | -0.039 (-0.231, 0.152)  | 0.008 (-0.181, 0.197)  | 0.006 (-0.184, 0.196)   | -0.041 (-0.231, 0.149)  | -0.010 (-0.198, 0.179) | -0.014 (-0.204, 0.176) |
| 3                          | 0.008 (-0.193, 0.209)   | 0.070 (-0.132, 0.271)  | 0.067 (-0.136, 0.271)   | -0.120 (-0.320, 0.080)  | -0.085 (-0.287, 0.116) | -0.092 (-0.295, 0.111) |
| 4+                         | -0.025 (-0.228, 0.178)  | 0.052 (-0.155, 0.259)  | 0.050 (-0.158, 0.258)   | 0.105 (-0.097, 0.307)   | 0.156 (-0.051, 0.363)  | 0.151 (-0.057, 0.359)  |
|                            | <b>Longitudinal</b>     |                        |                         |                         |                        |                        |
| <b>ACEs</b>                |                         |                        |                         |                         |                        |                        |
| 0                          | ref                     | ref                    | ref                     | ref                     | ref                    | ref                    |
| 1                          | 0.053 (-0.010, 0.116)   | 0.056 (-0.007, 0.119)  | 0.057 (-0.006, 0.120)   | -0.017 (-0.108, 0.075)  | -0.020 (-0.112, 0.072) | -0.019 (-0.11, 0.073)  |
| 2                          | 0.117 (0.052, 0.182)    | 0.125 (0.060, 0.191)   | 0.128 (0.062, 0.194)    | 0.074 (-0.021, 0.169)   | 0.077 (-0.019, 0.173)  | 0.082 (-0.014, 0.178)  |
| 3                          | 0.075 (0.007, 0.143)    | 0.090 (0.021, 0.159)   | 0.094 (0.025, 0.164)    | 0.050 (-0.048, 0.148)   | 0.050 (-0.05, 0.151)   | 0.058 (-0.044, 0.160)  |
| 4+                         | 0.089 (0.020, 0.158)    | 0.108 (0.036, 0.179)   | 0.111 (0.039, 0.182)    | -0.022 (-0.123, 0.078)  | -0.022 (-0.126, 0.082) | -0.017 (-0.121, 0.088) |

Model 1: Adjusted for years from baseline, baseline age centered at mean, and sex,

Model 2: Model 1 + childhood SES

Model 3: Model 2 + composite childhood support

ACEs: Adverse Childhood Experiences

1  
2  
3 CI: Confidence Interval  
4  
5  
6  
7  
8

9 *Figure 1: Prediction plot of linear mixed models estimate of the association of composite*  
10 *adverse childhood experiences (ACEs) with executive function across 3 waves*  
11  
12  
13

14 Adjusted for years from baseline, baseline age centered at mean, sex, childhood SES, and  
15 composite childhood support  
16  
17  
18  
19  
20  
21  
22  
23  
24  
25  
26  
27  
28  
29  
30  
31  
32  
33  
34  
35  
36  
37  
38  
39  
40  
41  
42  
43  
44  
45  
46  
47  
48  
49  
50  
51  
52  
53  
54  
55  
56  
57  
58  
59  
60

1  
2  
3  
4  
5  
6  
7  
8  
9  
10  
11  
12  
13  
14  
15  
16  
17  
18  
19  
20  
21  
22  
23  
24  
25  
26  
27  
28  
29  
30  
31  
32  
33  
34  
35  
36  
37  
38  
39  
40  
41  
42  
43  
44  
45  
46  
47  
48  
49  
50  
51  
52  
53  
54  
55  
56  
57  
58  
59  
60

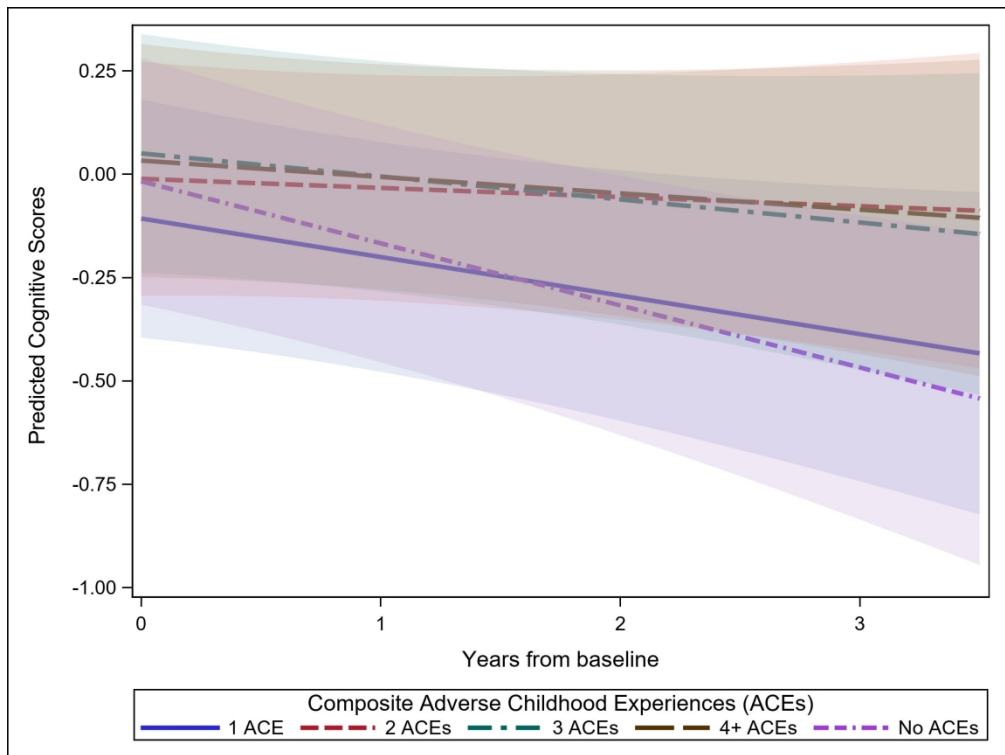

Figure 1: Prediction plot of linear mixed models estimate of the association of composite adverse childhood experiences (ACEs) with executive function across 3 waves

169x127mm (400 x 400 DPI)

Supplemental Figure 1: Prediction plot of linear mixed models estimate for the association of composite adverse childhood experiences (ACEs) with verbal episodic memory across 3 waves

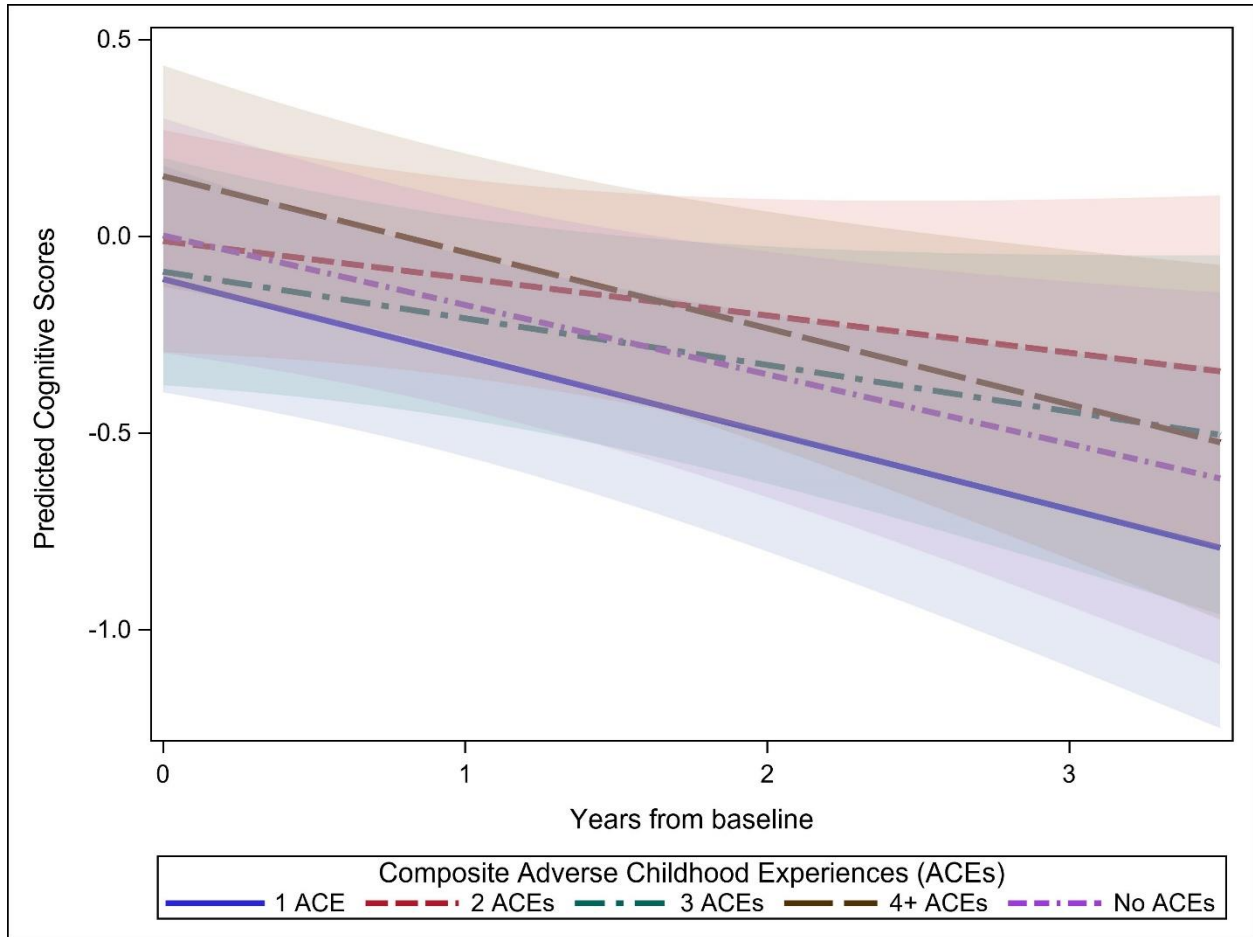

Adjusted for years from baseline, baseline age centered at mean, gender/sex, childhood SES, and composite childhood support

Supplemental Table 1: Linear mixed model with random intercept and slope of the association of individual adverse childhood experiences (ACEs) with domain-specific cognition adjusted for time, gender/sex, and parental education

|                        | Executive Function     |                        |                        | Verbal Episodic Memory |                        |                        |
|------------------------|------------------------|------------------------|------------------------|------------------------|------------------------|------------------------|
|                        | Cross-Sectional        |                        |                        |                        |                        |                        |
|                        | Model 1                | Model 2                | Model 3                | Model 1                | Model 2                | Model 3                |
|                        | $\beta$ (95% CI)       |
| Parent Separated       | -0.035 (-0.166, 0.095) | -0.040 (-0.169, 0.089) | -0.011 (-0.140, 0.118) | -0.006 (-0.140, 0.128) | -0.014 (-0.142, 0.115) | 0.017 (-0.112, 0.147)  |
| Parent Remarried       | -0.007 (-0.152, 0.139) | -0.017 (-0.161, 0.127) | 0.000 (-0.142, 0.142)  | 0.062 (-0.087, 0.212)  | 0.044 (-0.100, 0.188)  | 0.061 (-0.082, 0.203)  |
| Witnessed Violence     | 0.065 (-0.071, 0.200)  | 0.052 (-0.082, 0.186)  | 0.070 (-0.062, 0.201)  | 0.131 (-0.009, 0.270)  | 0.106 (-0.028, 0.240)  | 0.121 (-0.012, 0.253)  |
| Substance Abuse        | 0.118 (-0.029, 0.266)  | 0.126 (-0.02, 0.272)   | 0.119 (-0.025, 0.262)  | 0.096 (-0.056, 0.247)  | 0.111 (-0.035, 0.256)  | 0.107 (-0.037, 0.251)  |
| Loss Job               | 0.014 (-0.162, 0.190)  | 0.007 (-0.167, 0.181)  | 0.034 (-0.137, 0.206)  | 0.029 (-0.152, 0.210)  | 0.016 (-0.158, 0.190)  | 0.033 (-0.139, 0.205)  |
| Parent Jail            | -0.120 (-0.359, 0.118) | -0.116 (-0.352, 0.12)  | -0.064 (-0.298, 0.169) | -0.034 (-0.279, 0.211) | -0.022 (-0.257, 0.213) | 0.020 (-0.214, 0.254)  |
| Serious Family Illness | -0.014 (-0.146, 0.118) | -0.018 (-0.148, 0.112) | -0.011 (-0.139, 0.117) | 0.032 (-0.103, 0.167)  | 0.025 (-0.105, 0.155)  | 0.029 (-0.099, 0.157)  |
| Death Mother           | -0.007 (-0.275, 0.262) | -0.033 (-0.299, 0.233) | -0.028 (-0.289, 0.233) | 0.105 (-0.171, 0.381)  | 0.057 (-0.208, 0.322)  | 0.058 (-0.204, 0.320)  |
| Death Father           | -0.002 (-0.213, 0.209) | -0.006 (-0.215, 0.203) | 0.025 (-0.180, 0.231)  | -0.019 (-0.236, 0.199) | -0.024 (-0.233, 0.185) | -0.002 (-0.209, 0.205) |
|                        | Longitudinal           |                        |                        |                        |                        |                        |
|                        | Model 1                | Model 2                | Model 3                | Model 1                | Model 2                | Model 3                |
|                        | $\beta$ (95% CI)       |
| Parent Separated       | -0.006 (-0.140, 0.128) | -0.014 (-0.142, 0.115) | 0.017 (-0.112, 0.147)  | 0.018 (-0.025, 0.062)  | 0.018 (-0.025, 0.062)  | 0.018 (-0.026, 0.062)  |
| Parent Remarried       | 0.062 (-0.087, 0.212)  | 0.044 (-0.100, 0.188)  | 0.061 (-0.082, 0.203)  | 0.045 (-0.005, 0.094)  | 0.045 (-0.004, 0.095)  | 0.045 (-0.005, 0.094)  |
| Witnessed Violence     | 0.131 (-0.009, 0.270)  | 0.106 (-0.028, 0.240)  | 0.121 (-0.012, 0.253)  | 0.026 (-0.019, 0.072)  | 0.027 (-0.019, 0.072)  | 0.027 (-0.019, 0.072)  |
| Substance Abuse        | 0.096 (-0.056, 0.247)  | 0.111 (-0.035, 0.256)  | 0.107 (-0.037, 0.251)  | 0.034 (-0.016, 0.083)  | 0.033 (-0.016, 0.083)  | 0.033 (-0.016, 0.083)  |
| Loss Job               | 0.029 (-0.152, 0.210)  | 0.016 (-0.158, 0.190)  | 0.033 (-0.139, 0.205)  | 0.004 (-0.055, 0.063)  | 0.004 (-0.055, 0.063)  | 0.003 (-0.055, 0.062)  |
| Parent Jail            | -0.034 (-0.279, 0.211) | -0.022 (-0.257, 0.213) | 0.020 (-0.214, 0.254)  | 0.067 (-0.015, 0.149)  | 0.066 (-0.016, 0.148)  | 0.067 (-0.015, 0.149)  |
| Serious Family Illness | 0.032 (-0.103, 0.167)  | 0.025 (-0.105, 0.155)  | 0.029 (-0.099, 0.157)  | 0.038 (-0.006, 0.082)  | 0.038 (-0.006, 0.082)  | 0.038 (-0.006, 0.083)  |
| Death Mother           | 0.105 (-0.171, 0.381)  | 0.057 (-0.208, 0.322)  | 0.058 (-0.204, 0.320)  | -0.005 (-0.096, 0.087) | -0.005 (-0.096, 0.086) | -0.004 (-0.095, 0.087) |
| Death Father           | -0.019 (-0.236, 0.199) | -0.024 (-0.233, 0.185) | -0.002 (-0.209, 0.205) | 0.005 (-0.067, 0.076)  | 0.006 (-0.066, 0.077)  | 0.004 (-0.067, 0.076)  |

1  
2  
3 Model 1: Adjusted for baseline age centered at mean,  
4 Model 2: Model 1 + sex,  
5 Model 3: Model 2 + parental education  
6  
7  
8  
9  
10  
11  
12  
13  
14  
15  
16  
17  
18  
19  
20  
21  
22  
23  
24  
25  
26  
27  
28  
29  
30  
31  
32  
33  
34  
35  
36  
37  
38  
39  
40  
41  
42  
43  
44  
45  
46  
47

For peer review only

STROBE Statement—Checklist of items that should be included in reports of *cohort studies*

|                           | Item No | Recommendation                                                                                                                                                                                                                                                                                                         | Page No                      |
|---------------------------|---------|------------------------------------------------------------------------------------------------------------------------------------------------------------------------------------------------------------------------------------------------------------------------------------------------------------------------|------------------------------|
| <b>Title and abstract</b> | 1       | (a) Indicate the study's design with a commonly used term in the title or the abstract<br>(b) Provide in the abstract an informative and balanced summary of what was done and what was found                                                                                                                          | 1<br>3                       |
| <b>Introduction</b>       |         |                                                                                                                                                                                                                                                                                                                        |                              |
| Background/rationale      | 2       | Explain the scientific background and rationale for the investigation being reported                                                                                                                                                                                                                                   | 6                            |
| Objectives                | 3       | State specific objectives, including any prespecified hypotheses                                                                                                                                                                                                                                                       | 7-8                          |
| <b>Methods</b>            |         |                                                                                                                                                                                                                                                                                                                        |                              |
| Study design              | 4       | Present key elements of study design early in the paper                                                                                                                                                                                                                                                                | 8                            |
| Setting                   | 5       | Describe the setting, locations, and relevant dates, including periods of recruitment, exposure, follow-up, and data collection                                                                                                                                                                                        | 8                            |
| Participants              | 6       | (a) Give the eligibility criteria, and the sources and methods of selection of participants. Describe methods of follow-up<br>(b) For matched studies, give matching criteria and number of exposed and unexposed                                                                                                      | 8<br>n/a                     |
| Variables                 | 7       | Clearly define all outcomes, exposures, predictors, potential confounders, and effect modifiers. Give diagnostic criteria, if applicable                                                                                                                                                                               | 8-11                         |
| Data sources/measurement  | 8*      | For each variable of interest, give sources of data and details of methods of assessment (measurement). Describe comparability of assessment methods if there is more than one group                                                                                                                                   | 8-11                         |
| Bias                      | 9       | Describe any efforts to address potential sources of bias                                                                                                                                                                                                                                                              | 9-11                         |
| Study size                | 10      | Explain how the study size was arrived at                                                                                                                                                                                                                                                                              | n/a                          |
| Quantitative variables    | 11      | Explain how quantitative variables were handled in the analyses. If applicable, describe which groupings were chosen and why                                                                                                                                                                                           | 9-11                         |
| Statistical methods       | 12      | (a) Describe all statistical methods, including those used to control for confounding<br>(b) Describe any methods used to examine subgroups and interactions<br>(c) Explain how missing data were addressed<br>(d) If applicable, explain how loss to follow-up was addressed<br>(e) Describe any sensitivity analyses | 12<br>12<br>12<br>n/a<br>n/a |
| <b>Results</b>            |         |                                                                                                                                                                                                                                                                                                                        |                              |
| Participants              | 13*     | (a) Report numbers of individuals at each stage of study—eg numbers potentially eligible, examined for eligibility, confirmed eligible, included in the study, completing follow-up, and analysed<br>(b) Give reasons for non-participation at each stage<br>(c) Consider use of a flow diagram                        | n/a<br>n/a<br>n/a            |
| Descriptive data          | 14*     | (a) Give characteristics of study participants (eg demographic, clinical, social) and information on exposures and potential confounders<br>(b) Indicate number of participants with missing data for each variable of interest<br>(c) Summarise follow-up time (eg, average and total amount)                         | 12-13<br>n/a<br>8, 15        |
| Outcome data              | 15*     | Report numbers of outcome events or summary measures over time                                                                                                                                                                                                                                                         | 12-13                        |

|    |                          |    |                                                                                                                                                                                                              |       |
|----|--------------------------|----|--------------------------------------------------------------------------------------------------------------------------------------------------------------------------------------------------------------|-------|
| 1  | Main results             | 16 | (a) Give unadjusted estimates and, if applicable, confounder-adjusted estimates and their precision (eg, 95% confidence interval). Make clear which confounders were adjusted for and why they were included | 13-15 |
| 2  |                          |    | (b) Report category boundaries when continuous variables were categorized                                                                                                                                    | n/a   |
| 3  |                          |    | (c) If relevant, consider translating estimates of relative risk into absolute risk for a meaningful time period                                                                                             | n/a   |
| 4  |                          |    |                                                                                                                                                                                                              |       |
| 5  | Other analyses           | 17 | Report other analyses done—eg analyses of subgroups and interactions, and sensitivity analyses                                                                                                               | n/a   |
| 6  |                          |    |                                                                                                                                                                                                              |       |
| 7  |                          |    |                                                                                                                                                                                                              |       |
| 8  |                          |    |                                                                                                                                                                                                              |       |
| 9  |                          |    |                                                                                                                                                                                                              |       |
| 10 |                          |    |                                                                                                                                                                                                              |       |
| 11 | <b>Discussion</b>        |    |                                                                                                                                                                                                              |       |
| 12 | Key results              | 18 | Summarise key results with reference to study objectives                                                                                                                                                     | 15    |
| 13 | Limitations              | 19 | Discuss limitations of the study, taking into account sources of potential bias or imprecision. Discuss both direction and magnitude of any potential bias                                                   | 18-19 |
| 14 |                          |    |                                                                                                                                                                                                              |       |
| 15 | Interpretation           | 20 | Give a cautious overall interpretation of results considering objectives, limitations, multiplicity of analyses, results from similar studies, and other relevant evidence                                   | 15-18 |
| 16 |                          |    |                                                                                                                                                                                                              |       |
| 17 | Generalisability         | 21 | Discuss the generalisability (external validity) of the study results                                                                                                                                        | 17-18 |
| 18 |                          |    |                                                                                                                                                                                                              |       |
| 19 |                          |    |                                                                                                                                                                                                              |       |
| 20 |                          |    |                                                                                                                                                                                                              |       |
| 21 | <b>Other information</b> |    |                                                                                                                                                                                                              |       |
| 22 | Funding                  | 22 | Give the source of funding and the role of the funders for the present study and, if applicable, for the original study on which the present article is based                                                | 20    |
| 23 |                          |    |                                                                                                                                                                                                              |       |
| 24 |                          |    |                                                                                                                                                                                                              |       |
| 25 |                          |    |                                                                                                                                                                                                              |       |

\*Give information separately for exposed and unexposed groups.

**Note:** An Explanation and Elaboration article discusses each checklist item and gives methodological background and published examples of transparent reporting. The STROBE checklist is best used in conjunction with this article (freely available on the Web sites of PLoS Medicine at <http://www.plosmedicine.org/>, Annals of Internal Medicine at <http://www.annals.org/>, and Epidemiology at <http://www.epidem.com/>). Information on the STROBE Initiative is available at <http://www.strobe-statement.org>.
