# Supplementary material for: What is the association between adverse childhood experiences and late-life cognitive decline? Study of Healthy Aging in African Americans (STAR) cohort study
Source: PubMed Central journal article supplement — BMJ Open. 2023 Nov 2;13(11):e072961. doi: 10.1136/bmjopen-2023-072961 (PMC10626853; doi:10.1136/bmjopen-2023-072961), 2023-11-02
Supplement: bmjopen-2023-072961supp001.pdf [file bmjopen-2023-072961supp001.pdf]

Supplemental Figure 1: Prediction plot of linear mixed models estimate for the association of composite adverse childhood experiences (ACEs) with verbal episodic memory across 3 waves

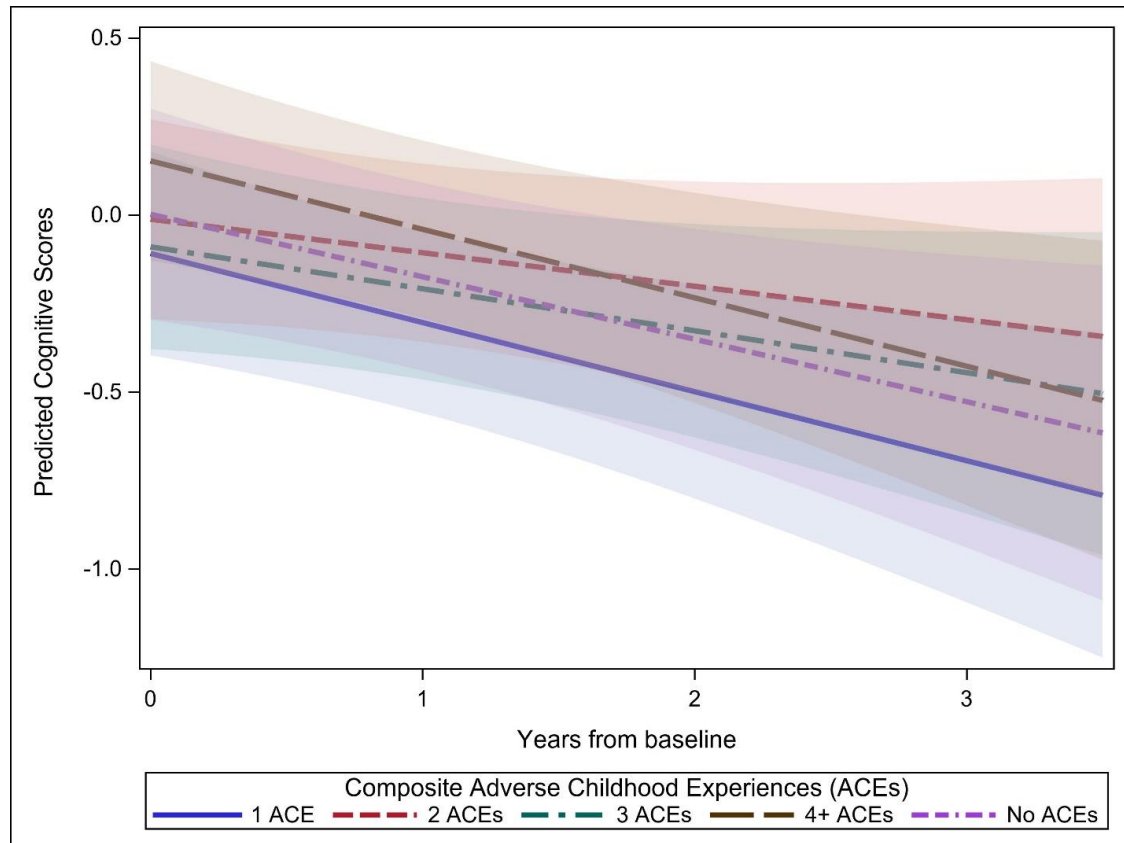

Adjusted for years from baseline, baseline age centered at mean, gender/sex, childhood SES, and composite childhood support

Supplemental Table 1: Linear mixed model with random intercept and slope of the association of individual adverse childhood experiences (ACEs) with domain-specific cognition adjusted for time, gender/sex, and parental education

|                               | Executive Function     |                        |                        | Verbal Episodic Memory |                        |                        |
|-------------------------------|------------------------|------------------------|------------------------|------------------------|------------------------|------------------------|
|                               | Cross-Sectional        |                        |                        |                        |                        |                        |
|                               | Model 1<br>β (95% CI)  | Model 2<br>β (95% CI)  | Model 3<br>β (95% CI)  | Model 1<br>β (95% CI)  | Model 2<br>β (95% CI)  | Model 3<br>β (95% CI)  |
| <b>Parent Separated</b>       | -0.035 (-0.166, 0.095) | -0.040 (-0.169, 0.089) | -0.011 (-0.140, 0.118) | -0.006 (-0.140, 0.128) | -0.014 (-0.142, 0.115) | 0.017 (-0.112, 0.147)  |
| <b>Parent Remarried</b>       | -0.007 (-0.152, 0.139) | -0.017 (-0.161, 0.127) | 0.000 (-0.142, 0.142)  | 0.062 (-0.087, 0.212)  | 0.044 (-0.100, 0.188)  | 0.061 (-0.082, 0.203)  |
| <b>Witnessed Violence</b>     | 0.065 (-0.071, 0.200)  | 0.052 (-0.082, 0.186)  | 0.070 (-0.062, 0.201)  | 0.131 (-0.009, 0.270)  | 0.106 (-0.028, 0.240)  | 0.121 (-0.012, 0.253)  |
| <b>Substance Abuse</b>        | 0.118 (-0.029, 0.266)  | 0.126 (-0.02, 0.272)   | 0.119 (-0.025, 0.262)  | 0.096 (-0.056, 0.247)  | 0.111 (-0.035, 0.256)  | 0.107 (-0.037, 0.251)  |
| <b>Loss Job</b>               | 0.014 (-0.162, 0.190)  | 0.007 (-0.167, 0.181)  | 0.034 (-0.137, 0.206)  | 0.029 (-0.152, 0.210)  | 0.016 (-0.158, 0.190)  | 0.033 (-0.139, 0.205)  |
| <b>Parent Jail</b>            | -0.120 (-0.359, 0.118) | -0.116 (-0.352, 0.12)  | -0.064 (-0.298, 0.169) | -0.034 (-0.279, 0.211) | -0.022 (-0.257, 0.213) | 0.020 (-0.214, 0.254)  |
| <b>Serious Family Illness</b> | -0.014 (-0.146, 0.118) | -0.018 (-0.148, 0.112) | -0.011 (-0.139, 0.117) | 0.032 (-0.103, 0.167)  | 0.025 (-0.105, 0.155)  | 0.029 (-0.099, 0.157)  |
| <b>Death Mother</b>           | -0.007 (-0.275, 0.262) | -0.033 (-0.299, 0.233) | -0.028 (-0.289, 0.233) | 0.105 (-0.171, 0.381)  | 0.057 (-0.208, 0.322)  | 0.058 (-0.204, 0.320)  |
| <b>Death Father</b>           | -0.002 (-0.213, 0.209) | -0.006 (-0.215, 0.203) | 0.025 (-0.180, 0.231)  | -0.019 (-0.236, 0.199) | -0.024 (-0.233, 0.185) | -0.002 (-0.209, 0.205) |
|                               | Longitudinal           |                        |                        |                        |                        |                        |
|                               | Model 1<br>β (95% CI)  | Model 2<br>β (95% CI)  | Model 3<br>β (95% CI)  | Model 1<br>β (95% CI)  | Model 2<br>β (95% CI)  | Model 3<br>β (95% CI)  |
| <b>Parent Separated</b>       | -0.006 (-0.140, 0.128) | -0.014 (-0.142, 0.115) | 0.017 (-0.112, 0.147)  | 0.018 (-0.025, 0.062)  | 0.018 (-0.025, 0.062)  | 0.018 (-0.026, 0.062)  |
| <b>Parent Remarried</b>       | 0.062 (-0.087, 0.212)  | 0.044 (-0.100, 0.188)  | 0.061 (-0.082, 0.203)  | 0.045 (-0.005, 0.094)  | 0.045 (-0.004, 0.095)  | 0.045 (-0.005, 0.094)  |
| <b>Witnessed Violence</b>     | 0.131 (-0.009, 0.270)  | 0.106 (-0.028, 0.240)  | 0.121 (-0.012, 0.253)  | 0.026 (-0.019, 0.072)  | 0.027 (-0.019, 0.072)  | 0.027 (-0.019, 0.072)  |
| <b>Substance Abuse</b>        | 0.096 (-0.056, 0.247)  | 0.111 (-0.035, 0.256)  | 0.107 (-0.037, 0.251)  | 0.034 (-0.016, 0.083)  | 0.033 (-0.016, 0.083)  | 0.033 (-0.016, 0.083)  |
| <b>Loss Job</b>               | 0.029 (-0.152, 0.210)  | 0.016 (-0.158, 0.190)  | 0.033 (-0.139, 0.205)  | 0.004 (-0.055, 0.063)  | 0.004 (-0.055, 0.063)  | 0.003 (-0.055, 0.062)  |
| <b>Parent Jail</b>            | -0.034 (-0.279, 0.211) | -0.022 (-0.257, 0.213) | 0.020 (-0.214, 0.254)  | 0.067 (-0.015, 0.149)  | 0.066 (-0.016, 0.148)  | 0.067 (-0.015, 0.149)  |
| <b>Serious Family Illness</b> | 0.032 (-0.103, 0.167)  | 0.025 (-0.105, 0.155)  | 0.029 (-0.099, 0.157)  | 0.038 (-0.006, 0.082)  | 0.038 (-0.006, 0.082)  | 0.038 (-0.006, 0.083)  |
| <b>Death Mother</b>           | 0.105 (-0.171, 0.381)  | 0.057 (-0.208, 0.322)  | 0.058 (-0.204, 0.320)  | -0.005 (-0.096, 0.087) | -0.005 (-0.096, 0.086) | -0.004 (-0.095, 0.087) |
| <b>Death Father</b>           | -0.019 (-0.236, 0.199) | -0.024 (-0.233, 0.185) | -0.002 (-0.209, 0.205) | 0.005 (-0.067, 0.076)  | 0.006 (-0.066, 0.077)  | 0.004 (-0.067, 0.076)  |

Model 1: Adjusted for baseline age centered at mean,

Model 2: Model 1 + sex,

Model 3: Model 2 + parental education
